1 **Single-cell RNA sequencing identifies regulators of**  
2 **differentiation and nutritional cues in *Drosophila* female germ**  
3 **cells**

4 **Zhipeng Sun<sup>1,2#</sup>, Todd G. Nystul<sup>3\*</sup>, Guohua Zhong<sup>1,2\*</sup>**

5 <sup>1</sup> Key Laboratory of Crop Integrated Pest Management in South China, Ministry of Agriculture and Rural Affairs; South China  
6 Agricultural University, Guangzhou 510642, China; szp617488580@outlook.com (Z.S.);

7 <sup>2</sup> Key Laboratory of Natural Pesticide and Chemical Biology, Ministry of Education, South China Agricultural University,  
8 Guangzhou 510642, China.

9 <sup>3</sup> UCSF, Department of Anatomy, 513 Parnassus Ave, San Francisco, CA 94143, USA.

10 \* Corresponding author: todd.nystul@ucsf.edu; guohuazhong@scau.edu.cn (G. Zhong); Tel.: +86-20-85280308.

11

12 **ABSTRACT:**

13 *Key words:* single cell RNA sequencing; germline stem cell; *eggpl*; gene expression pattern; GSC regulatory network

14

15 *Drosophila* ovarian germline stem cells (GSCs) are powerful model for stem cell research. However, due to the scarcity  
16 of GSCs in ovarian tissue, it is difficult to obtain the transcriptional profile of GSCs and identify novel GSC markers. In  
17 this study, we took advantage of single cell RNA sequencing (scRNA-seq) to profile the germline cells and somatic cells  
18 in wild type *Drosophila* ovary. We then performed an *in vivo* RNAi screen and network analysis to identify genes that are  
19 involved in the early stages of germ cell differentiation. We identified 33 genes with limited expression during early germ  
20 cell development and identified 19 genes that potentially regulate germ cell differentiation. Among these, an  
21 uncharacterized gene, which we named *eggplant* (*eggpl*), is highly expressed in GSC and downregulated in early daughter  
22 cells. Upon RNAi knockdown of *eggpl*, we observed an increase in germ cell proliferation, an accumulation of cysts in  
23 the early mitotic (2- and 4-cell) stages and an increase in overall ovary size compared to control when flies were  
24 maintained on a standard diet. In flies fed a rich yeast diet, the expression of *eggpl* was significantly lower and the effects  
25 of *eggpl* RNAi were suppressed, suggesting that downregulation of *eggpl* may link nutritional status to germ cell  
26 proliferation and differentiation. We also found that the matrix metalloproteases, *Mmp1* and *Mmp2* as well as the tissue  
27 inhibitor of metalloproteases (*Timp*) are additional regulators of *eggpl*. Collectively, this study provides new insight into  
28 the signaling networks that regulate early germ cell development and identifies *eggpl* as a key player in this process.

29

30

31 **1. Introduction**

32 The female reproductive system of *Drosophila melanogaster* has been well studied to understand the complex  
33 regulation of germline development (1, 2). Structurally, *Drosophila* ovary is made of 16-20 ovarioles, and 2-3 germline  
34 stem cells (GSC) reside in the anterior-most region of each ovariole (3). The GSCs reside in a specialized niche  
35 microenvironment and divide asymmetrically to produce one daughter cell which maintains the stem cell identity and  
36 another daughter cell that is displaced away from the niche and initiates differentiation as a cystoblast (CB). The CBs  
37 undergo four rounds of synchronous mitosis with incomplete cytokinesis, which eventually give rise to 15 nurse cells and  
38 1 oocyte. Within the stem cell niche, several short-range extrinsic signals and intrinsic stemness-promoting factors are  
39 crucial to maintain the GSCs self-renewal and differentiation. The action of these signals is patterned by the somatic niche  
40 cells, which comprises terminal filament cells (TFs), cap cells (CpCs) and escort stem cells (ESCs) (4-6). *Decapentaplegic*  
41 (*dpp*) is one of the necessary and sufficient niche-derived factors for GSC maintenance. A high level of *dpp* signaling  
42 activity activates the bone morphogenic proteins (BMP) signaling pathway to transcriptionally silence the expression of  
43 differentiation promoting factor bag-of-marbles (*bam*), and sustains GSC identity. In contrast, CB positioned outside the  
44 niche experiences a weaker *Dpp* signal and triggers *bam* expression for differentiation (7). The escort cells (ECs) also  
45 express Epidermal Growth Factor (EGF) to promote a differentiation program in CB by repress the transcription of *division*  
46 *abnormally delayed* (*dally*) (8). In addition, both nuclear organization and chromatin modification are also play a key role  
47 in the regulation of GSC homeostasis. For example, it was reported that a linker histone H1 is intrinsically required for  
48 GSC maintenance, since the depletion of H1 in the germline cells would lead to premature expression of *Bam* and the loss  
49 of GSCs (9). Similar to *scrawny* (*scny*), an H2B ubiquitin protease, it is highly expressed in GSCs to suppress methylation  
50 at lysine residues and functionally repress target genes. Loss of *scny* results in early expression of *Bam* (10). It has also  
51 been shown that *dSETDB1* or *eggless* (*egg*), a histone methyltransferase, was responsible for GSC fate. Depletion of *egg*

52 in GSC impairs self-renewal, while the *egg*-deficient GSCs could differentiate normally (11). In addition, stonewall (*Stwl*),  
53 a chromatin-associated protein which acts as a dominant Suppressor of variegation, is enriched in GSCs (12). Mei-P26  
54 suppresses transcripts that promote differentiation in CBs by antagonizing miRNA pathway. However, *zpg* is essential to  
55 activate the differentiation of GSC progeny (13). Therefore, the proper balance of intrinsic and extrinsic gene expression  
56 is imperative for GSC self-renewal and differentiation.

57 An additional layer of regulation of the GSC niche comes from signals that communicate the availability of a rich diet.  
58 On high protein diet, GSCs and their descendent exhibit an increased rate of division and differentiation, and this response  
59 to diet is regulated by the evolutionarily conserved insulin signaling pathway. Neurosecretory cells in the brain produce  
60 the insulin-like peptides (DILPs), which directly regulate the G2 phase of GSC division and stimulate cyst growth (14-15).  
61 In flies fed a yeast-rich diet, the ovary size and egg production are significantly increased. (16). This is due to the action of  
62 insulin on the GSC niche cells, which facilitates GSC proliferation and maintenance, in part by promoting the extension of  
63 escort cell membranes to wrap around GSC and cysts (17). The membrane extensions are regulated by a membrane protein,  
64 Failed axon connections (*Fax*), which is induced by S6K activation downstream of the insulin receptor. Insulin also acts  
65 on cap cells to promote Notch Signaling and stimulate the physical adhesion between cap cells and GSCs through E-  
66 cadherin (18). However, the downstream response in germ cells to these nutrient-activated cues is not well understood.

67 In this study, we identified 33 genes that are differentially expressed during early germ cell development and that 19  
68 of these are required for germ cell function. These genes were identified by scRNA-seq analysis of adult wildtype ovaries  
69 followed by validation of expression patterns *in vivo* and an RNAi screen for GSC decrease/increase, GSC loss and tumor  
70 formation. In addition, network analysis of the differentially expressed genes in undifferentiated germ cell-1 and -2 clusters  
71 revealed several common nodes. Among the genes we identified *CG32814*, is an uncharacterized gene which we have  
72 renamed *eggplant* (*eggpl*). We found that *eggpl* is specifically expressed in GSC at transcriptional level, but *Eggpl* protein  
73 is detectable in germ cells throughout Region 1. We find that *eggpl* is also expressed in larval male and female gonads and  
74 in adult testes as well. We also found that cell cycle in germ cell cysts was accelerated and the ovaries were larger in flies  
75 in which *eggpl* was depleted, either by RNAi or in a CRISPR knockout. In contrast, in flies fed a rich yeast diet, *eggpl*  
76 expression was reduced and the difference in germ cell proliferation rates and ovary size between the control and *eggpl*  
77 knockdown genotypes was reduced. Notably, we found that the MMP-dependent Timp pathway is an additional regulator  
78 of *eggpl* in germ cells. Taken together, these findings reveal the regulators that controls early germ cell differentiation and  
79 coordinate the rate of germline stem cell division with nutrient availability.

80

## 81 **2. Materials and Methods**

### 82 *2.1. Fly stocks and fly husbandry*

83 The gene names, genetic symbols, and detailed information about fly strains applied in this study are presented in the  
84 text and in FlyBase. All fly stocks were maintained at 25°C and reared on standard cornmeal agar food. For RNAi  
85 experiments, crosses were set up at 18°C and adults were transferred to 29°C upon eclosion for 7-9 days. The following  
86 flies were used in this study: *y<sup>1</sup>w<sup>1118</sup>*, *nos-Gal4/CyO*; *tub-Gal80<sup>S</sup>/TB*, *vasa-EGFP*, *nos-Gal4*, *UAS-Timp*, *UAS-Timp-RNAi*,  
87 *UAS-Mmp1-RNAi*, *UAS-Mmp1-f2<sup>E225A</sup>*, *UAS-Mmp1-fDN<sup>P10.PX</sup>*, and *UAS-Mmp2-AGPI* (gifts from Suning Liu, South China  
88 Normal University, China), *bam-GFP* (a gift from Yu. Cai, Temasek Life Sciences Laboratory, Singapore).

89 The RNAi fly lines were obtain from Bloomington Stock center or Tsinghua Fly center and a full list of genotypes is  
90 provided as Supplementary Information (**Supplementary Table 2**).

91

## 92 2.2. Ovarian cell suspension for scRNA-seq

93 Newly emerged virgin female flies were fed for 1 week to encourage ovarian growth, then 150 flies were dissected in  
94 a petri dish containing 1mL of S-FBS (Serum-free Schneider's insect medium (Sigma-Aldrich, cat. no. S0146)  
95 supplemented with 10% (v/v) fetal bovine serum (FBS), heat inactivated (Sigma-Aldrich, cat. no. F4135)) under the  
96 microscope (Leica, SAPO, Germany). After dissection, we discarded S-FBS and added 1 mL of PBS to rinse ovaries in a  
97 1.5-ml centrifuge tube, and allowed samples to settle for 5 min, and then rinsed them twice with PBS. Dissociation was  
98 carried out at room temperature in 700  $\mu$ l of dissociation medium by adding 70  $\mu$ l of 5% (w/v) trypsin (Invitrogen, cat. no.  
99 27250-018) and 70  $\mu$ l of 2.5% (w/v) collagenase (Invitrogen, cat. no. 17018029) to 560  $\mu$ l of PBS, and incubated for 15  
100 min with continuous shaking. After incubation, the ovarian cell suspension was pipette into a 40- $\mu$ m mesh cell strainer, and  
101 filtered suspension into a 1.5-ml centrifuge tube containing 500  $\mu$ l of S-FBS. Then, the empty tube and cell strainer were  
102 washed by 100  $\mu$ l of S-FBS respectively to collect the remaining cells. The cell suspension was collected by centrifuging  
103 5 min at  $425 \times g$ , 4°C, and discarded the S-FBS and resuspended the pellets in each tube with 200  $\mu$ l of serum-free  
104 Schneider's insect medium, after that we combined the suspensions into one tube. Following, the cell viability was  
105 examined by using 0.4% trypan blue (Solarbio, cat. no. T8070) in the proportion of 1:1, and counted by a hemocytometer.  
106 The concentration of cell suspension was  $1.37 \times 10^6$  cells/ml, and the viability was 90% at least, according to 10 $\times$  Genomics  
107 recommendations.

108

## 109 2.3. Single-cell RNA sequencing

110 Single-cell libraries were constructed using Chromium single-cell 3' Library (v2) kit via End Repair, A-tailing,  
111 Adaptor Ligation, and PCR according to the manufacturer's protocol. In brief, the cells of each group were mixed into one  
112 sample and adjusted to 1000 cell/ $\mu$ l. Then, the indexed sequencing libraries which contained the P5 and P7 primers were  
113 prepared using Chromium single-cell 3' Reagent kit, and the barcoded sequencing libraries were quantified using a standard  
114 curve-based qPCR assay (KAPA Biosystems, USA) and Agilent Bioanalyzer 2100 (Agilent, Loveland, CO, USA).  
115 Subsequently, the library sequencing was performed by Illumina HiSeq 4000 with a custom paired-end sequencing mode  
116 26 bp (read 1)  $\times$  98 bp (read 2).

117

## 118 2.4. 10 $\times$ Genomics initial quality control

119 The scRNA-seq data were processed with the Cell Ranger Single Cell Software Suite (v6.1)  
120 (<http://software.10xgenomics.com/single-cell/overview/welcome>) for quality control, sample demultiplexing, barcode  
121 processing, and single-cell 3' gene counting. First, the raw data were demultiplexed by using an 8 bp index read at the end  
122 of Read 1 and Read 2 paired-end reads, to generate FASTQ files, and then quality control was performed using FastQC,  
123 and these data were aligned against the Nucleotide Sequence Database (<https://www.ncbi.nlm.nih.gov/genbank/>) using the  
124 NCBI Basic Local Alignment Search Tool (BLAST). Second, the reads were aligned to the *Drosophila* reference genome  
125 (dm6) ([https://www.ncbi.nlm.nih.gov/assembly/GCF\\_000001215.4/#/st](https://www.ncbi.nlm.nih.gov/assembly/GCF_000001215.4/#/st)) by STAR RNA-Seq aligner. Once aligned,  
126 barcodes associated with these reads-UMIs were subjected to filtering and correction. For UMI tag counting, the 10 $\times$   
127 Genomics pipeline Cell Ranger was used to generate single-cell gene counts for each library. The confidently mapped,  
128 non-PCR duplicates with valid barcodes and UMIs were eventually used to generate the gene-barcode matrix. For the  
129 higher-depth libraries, the samples were normalized to the sample sequencing depth. CellRanger version 2.0.0 and Seurat  
130 (v4.0.4) (19). R package were used to filter out the low-quality cells, and the following criteria were used to filter cells: (1)  
131 gene counts >3000 per cell; (2) UMI counts >12 000 per cell; and (3) percentage of mitochondrial genes >30%. In this

132 study, the estimated cell number was derived by plotting the UMI counts against the barcodes and revealed 21755 cells  
133 used for downstream analysis. Based on the transcriptomes of 21755 cells, a total of 0.39 billion clean reads achieving an  
134 average read of 18202 per cell and the ratio of high-quality reads to qualify scores at Q30 was more than 90.6% were  
135 obtained. The total number of read pairs that were assigned to this library in demultiplexing is 395,988,785, and the valid  
136 Barcodes (Fraction of reads with barcodes that match the whitelist after barcode correction) and valid UMIs (unique  
137 molecular identifier) are 97.8% and 100% respectively. The number of estimated cells is 21,755 with 18,202 mean reads  
138 per cell, and the number of median genes per cell was 638. The rough sequencing data were filtered according to the  
139 criterion that any cell containing more than 25,000 UMIs counts and more than 30% mitochondrial UMIs was filtered out.  
140 We finally obtained 8497 out of 21,755 cells with 3,993 median UMIs per cell and 868 median genes per cell  
141 (**Supplementary Table. 1**) for scRNA-seq analysis.

142

### 143 *2.5. Clustering analysis*

144 For the clustering, we used principal component analysis (PCA) to normalize and filter the gene-barcode matrix and  
145 to reduce feature dimensions. The top 5 major components were selected to obtain the visualized 2D clustering image using  
146 T-distributed stochastic neighbor embedding (tSNE). The graph-based clustering method was applied to group cells with  
147 similar expression patterns of marker genes. The ovarian cell clusters were grouped into 24 unsupervised categories using  
148 the different resolution parameters ( $R=0.5$  or default values). The pairwise Pearson correlation was calculated between  
149 each cluster for hierarchical clustering. Based on the differentially expressed gene results, a visualized heat map was created  
150 using Seurat (v4.0.4) R package. The tSNE plot was generated for a graphical representation of specific gene expression  
151 by Loupe Cell Browser software and Seurat (v4.0.4) R package. Notably, in order to improve the accuracy of trajectory  
152 based on our clustering results, we removed the cells which expressed somatic cell marker *tj*, and non-*vasa* (*vas*) expressing  
153 cells in germline clusters.

154

### 155 *2.6. Marker gene analysis and Monocle pseudotime analysis*

156 The candidate marker genes which enriched in a specific cluster were selected according to the expression profile of  
157 top genes among 24 clusters, and the putative biological identity of each cluster was assigned based on the expression  
158 patterns of highly expressed genes and experimentally validated markers. Single-cell pseudotime analysis were carried out  
159 by using matrices of cells and gene expression by Monocle (v2.20.0) which provided the visualized trajectory with tips  
160 and branches in the reduced dimensional space.

161

### 162 *2.7. Differential gene expression analysis*

163 The likelihood-ratio test (20) was used to seek differential expression profiles in each cluster, and the following  
164 criterion were allowed to identify the differentially expressed genes: (1)  $P\text{-value} \leq 0.01$ . (2)  $\text{Log}_2(\text{fold change [FC]}) \geq$   
165  $0.360674$ . (3) The percentage of cells where the gene is detected in a specific cluster  $>25\%$ . Then, Gene Ontology (GO)  
166 enrichment analysis was performed to filter the differentially expressed genes that correspond to biological functions. The  
167 peak-related genes were mapped to GO terms in the GO database (<http://www.geneontology.org/>), and the significantly  
168 enriched GO terms were defined by a hypergeometric test. To further understand the biological functions of these genes,  
169 we used Kyoto Encyclopedia of Genes and Genomes (KEGG) (<https://www.kegg.jp/>) pathway enrichment analysis to  
170 identify the enriched metabolic pathways and signal transduction pathways.

171

## 172 2.8. Gene regulatory network analysis

173 The transcription factor network inference was conducted by SCENIC R package. The log-normalized expression was  
174 generated by using Seurat, and the pipeline was implanted step by step. Preliminarily, the gene co-expression was identified  
175 via GENIE3, which may include some false positives and indirect targets. Then, we identified putative direct-binding  
176 targets by pruning each co-expression module via Rcis Target. Precisely, networks (regulons) were retained if the TF-  
177 binding motif was enriched among its targets, while target genes without direct TF-binding motifs were removed. Last, we  
178 scored the activity of each regulon for each single cell via the AUC scores using AUCcell R package.

179 The *Cytoscape* v.3.9.1 software was applied for the construction of gene regulatory network according to its online  
180 user manual.

## 181 2.9. RNA *in situ* hybridization

182 Probe synthesis. Using the genomic DNA as a template, and amplifying the exon regions of targeted genes by using  
183 the primers with SP6 sequence (ATTTAGGTGACACTATAGAAGNG) according to the product description of KAPA HiFi  
184 PCR Kit (Roche Diagnostics, cat. no. 07958927001). Sense and antisense digoxigenin (DIG)-labeled probes were  
185 synthesized from the purified PCR product using DIG RNA Labeling Kit (Roche, cat. no.11175025910). All primer  
186 sequences were listed in Supplementary Information (Supplementary Table 3).

187 The procedures for RNA *in situ* hybridization were as follows. Briefly, the samples were dissected in PBS and  
188 immediately fixed in 4% PFA with 0.1 M Hepes at 4°C overnight. On the next day, the samples were washed 3 × 10 min  
189 with PBST (0.1% Tween 20 in PBS) and dehydrated with sequential washes with 50% and 100% methanol in PBST for 5  
190 min each time. Then, the samples were stored in the -20°C refrigerator for 40 min, and washed with PBST 3 × 10 min  
191 before proteinase K (Sigma-Aldrich, cat. no. 39450016) treatment for 5 min at room temperature. Samples were washed  
192 with PBS for 5 min and fixed with 4% PFA for 20 min, then washed with PBST 3 × 10 min and incubated in hybridization  
193 buffer (50% formamide, 5x SSC, 0.1% Tween-20, 50 µg/µl heparin, and 100 µg/ml salmon sperm DNA) with probe in  
194 hybridization oven (Jingxin industrial development co. ltd, LF-I) at 60°C for 24 h at least. After hybridization, the samples  
195 were washed 4 × 30 min at 60°C, once with 2x SSCT (2x SSC, 0.1% Tween-20) for 15 min and twice with 0.2x SSCT  
196 (0.2x SSC, 0.1% Tween-20) for 30 min each at 60°C. Next, samples were washed with MABT (0.1 M maleic acid; 0.15M  
197 NaCl PH 7.4 and 0.1% Tween-20) 2 × 10 min at room temperature and blocked for at least 30 min, and then added anti-  
198 dig-POD (1:200; Roche, cat. no.11207733910) in 5% blocking solution (Roche, cat. no.11096176001) at room temperature  
199 overnight. Finally, the fluorescence reaction was carried out by using TSA fluorescein system (Perkin Elmer, cat. no. TS-  
200 000100) for 1.5 h in dark and subsequently used Hoechst 33258 (Sigma-Aldrich, cat. no. 23491454) to label the nucleus.

201

## 202 2.10. Construction of the transgenic fly lines

203 We first designed guide RNA targets with: 1. Chopchop (<https://chopchop.cbu.uib.no/>) (21), 2. CCTop  
204 (<https://cctop.cos.uni-heidelberg.de/>) (22). Genomic DNA was isolated from the injection stock. PCR was performed using  
205 primers flanking the targets. The amplified products were sent for Sanger sequencing. If SNPs were found on the targets,  
206 gRNA sequence would be modified to be consistent with the target sequence of the stock.

207 The first base of gRNA sequence was changed to G for the T7 transcription. Following the protocol (23), template for  
208 *in vitro* transcription by T7 polymerase was generated by annealing of two DNA oligonucleotides and PCR amplification.  
209 *In vitro* transcription was performed with the T7 RiboMAX™ Kit (Promega, cat. no. P1320). Transcripts were purified by  
210 phenol-choloroform extraction and isopropanol precipitation.

211 Plasmid MLM3613 (Addgene plasmid, cat. no. 42251) was linearized with Pme I (New England Biolabs) and purified

212 by ethanol precipitation. Cas9 mRNA was transcribed with mMESSAGE mMACHINE® T7 Transcription Kit (Ambion,  
213 cat. no. C013843), polyadenylated with the E.coli Poly (A) polymerase Kit (NEB, cat. no. M0276L), and purified with the  
214 RNeasy Mini Kit (QIAGEN, cat. no. 74106).

215 To knock in the 6 × HA of GFP in the N-terminal of *eggpl*, the pBluescript SK vector (pBS) was used as the backbone.  
216 Using genomic DNA of the injection stock, the homology 5' arm and 3' arm was amplified and linked to the pBS backbone  
217 with Gibson Assembly Kit (NEB, cat. no. E2611L) as 'pBS-CG32814-arm'. Then the pBS-*eggpl*-arm was linearized by  
218 PCR and linked to the GFP-6HA cassette with Gibson Assembly Kit (Thermo Fisher, cat. no. A46624), and that produced  
219 the final donor construct 'pBS-CG32814-GFP-6HA' (supplementary Fig.3 A).

220 To generate a mutant allele of *eggpl*, we used Cas9/CRISPR to introduce mutations downstream of the ATG in the  
221 *eggpl* open reading frame. We identified an allele, *eggpl<sup>l1</sup>* in which the 5 base pairs immediately downstream from the  
222 ATG (AGTAG) were deleted and a 28-base pair region that is 50 base pairs downstream from the ATG  
223 (TTAAAACGGACACCATCGGCGAAGAAA) contained multiple deletions and substitutions. In *eggpl<sup>l1</sup>*, this 28 base pair  
224 region was instead an 18 base pair region with the following sequence: CTTCTTCACCATTTTCAC. The resulting allele  
225 contains several frameshifts that alter the coding sequence of the 5' end of the gene but restore the normal reading frame  
226 after the 27<sup>th</sup> codon. The DNA sequence of this mutated region in the *eggpl<sup>l1</sup>* allele, starting at the ATG of the open reading  
227 frame, is ATG-----CGGAATCATTTTCAGACAGAATCCAGATGGATCTTTTTTCACCTTCTt---C-ttCACCATtttC---  
228 ---AcC. Dashes indicate the location of deletions and lowercase letters indicate substitutions, relative to the wildtype  
229 sequence. The gRNA sequences is list below,

230 CG32814-sg1: GTTAGAATCAAAATGAGTAG

231 CG32814-sg2: GCTTTTAAAACGGACACCAT

232 The primers for validation was GGAGTCTCCAGCAATTACTGTAT and CCCTGATTGCAATGAGTTTTTCAGT.

233 15ug of Cas9 mRNA and 7.5ug sgRNA were mixed with DEPC water in a 30ul volume. And the RNA mix injection  
234 was performed by Qidong Fungene Biotechnology (<http://www.fungene.tech>). 300 embryos were injected.

235 When the injected P0 embryos grew into adults, they were crossed with *Fm7a*. The genomic DNA of the P0 and F1 flies  
236 was extracted. PCR was performed using primers for validation of mRuby3 insertion:

237 F: AAGTTGTCAGCCGATTGGCGTGG

238 R: ATTCACTTTTCCATTATTGAATG

239 The F2 flies from positive F1 tubes were balanced with *Fm7a*.

240 Transgenic fly lines w\*; P{UAS-*eggpl*-GFP}attP2/TM6B was generated by integrating *UAS-eggpl-GFP* into the attP2  
241 site. Briefly, the NotI/XbaI PCR fragment of *eggpl*-CDS (GFP tag) was cloned into the NotI/XbaI sites of pJFRC28-10 ×  
242 UAS-IVS-GFP-p10 vector (Addgene Plasmid, cat. no. 36431). The primer pairs used for PCR validation were as following:

243 *eggpl*-3F: ACAACAAAGCCATATGATGAG

244 p10-R: GCCACTAGCTCGCTATACACT

245

## 246 2.11. Whole-mount immunofluorescence staining and confocal imaging

247 Ovaries were dissected in PBS and fixed in 4% PFA, 0.1 M HEPES, PH 7.4 for 30 min at room temperature with gentle  
248 rotation, then washed the ovaries 3 × 15 min with 500 μL 0.1% PBT (0.1% Triton X-100 in PBS). The samples were  
249 blocked in 5% NGS buffer (5% normal goat serum in 0.1% PBT) for 1 h before incubation with primary antibody at room  
250 temperature overnight. The following day, diluted primary antibody was collected for reuse, and the samples were washed  
251 3 × 15 min with 500 μL PBT and incubated with diluted secondary antibody for 3h with rotation. The Hoechst labeling

252 was performed after washing with PBT  $3 \times 15$  min. Finally, the samples were mounted on slides in Vectashield mounting  
253 medium and stored at 4°C. Note that, 50% normal goat serum in 0.1% PBT and higher concentration of diluted primary  
254 antibody were recommended to apply for the continuous antibody staining procedure after RNA *in situ* hybridization. For  
255 pMad staining, the samples were suggested to fix in 4% PFA for 50 min, and washed the ovaries with 0.1% PBT three  
256 times for 3 h at least.

257 The following primary antibodies were applied in this study: mouse anti- $\alpha$ -Spectrin (3A9, 1:100; Developmental  
258 Studies Hybridoma Band (DSHB)), rabbit anti-pMad (1:800; Cell Signaling), chicken anti-GFP (1:5,000; Abcam), rat anti-  
259 Vasa (1:100, DSHB). Alexa Fluor 488, 555, or 633 conjugated goat secondary antibodies (gifts from Yu. Cai, Temasek Life  
260 Sciences Laboratory, Singapore) against mouse (1:500), rabbit (1:1,000), chicken (1:500) and rat (1:1,000) were used to  
261 detect the primary antibodies. Polyclonal anti-TfIIA-S and anti-eggpl were generated via immunization of rabbits (Custom  
262 made for chickens by GeneCreate Biotech Co., Wuhan, China, 1:1,000). The DNA dyes Hoechst 33258 (1:5,000; Cell  
263 Signaling Technology) was used to label the nucleus.

264 Images were captured by using the Nikon A1 plus confocal microscope (Nikon, Japan) with APO 60 $\times$ /1.40 oil  
265 objective lens at room temperature, and all images were processed with NIS-Elements software for image acquisition and  
266 analysis. The mean of fluorescence intensity was examined by using ImageJ v1.8.0 software according to the manual  
267 instruction (supplementary Fig.3 C) or Imaris (Fig. 5L-M). For image analysis in Imaris, surfaces were generated in the  
268 green (GFP) channel and manually split or merged to generate a single surface for each cyst in Region 1. Then, the mean  
269 pixel intensity in the green channel within each surface was calculated.

270

#### 271 2.12. *BrdU* incorporation

272 5-Bromo-2'-deoxyuridine (BrdU), an analog of the nucleoside thymidine, was used in examining the frequency of  
273 the S-phase during cellular cycle in this study. The BrdU (Sigma-Aldrich, cat. no. B5002) saturated solution was freshly  
274 diluted with 200  $\mu$ L PBS (10 mM) and 800  $\mu$ L dehydrated alcohol. The female flies were dissected in petri dish containing  
275 1 mL Schneider's insect medium at room temperature, then the ovaries were carefully transferred into a 12-well plate with  
276 the mixture of BrdU solution and Schneider's insect medium (1:100) for further incubation at 25°C. After 45 min, the  
277 ovaries were rinsed with Schneider's insect medium for 2 times and washed with PBS  $1 \times 5$  min respectively, and fixed in  
278 4% PFA for 50 min. The samples were washed  $2 \times 10$  min with 0.3% PBT (0.3% Triton X-100 in PBS), sequentially,  
279 washed with 0.6% PBT (0.6% Triton X-100 in PBS) for 45 min. Acid-treating the ovaries with 1 mL 0.6% PBT and 1mL  
280 3.2 mol/L HCL for 30 min, and then the ovaries were washed with 0.3% PBT  $3 \times 10$  min and 0.1% PBT for 30 min. The  
281 ovaries were blocked by 10% NGS (10% normal goat serum in 0.1% PBT) for 1 h and incubated with 1: 50 mouse anti-  
282 BrdU monoclonal antibody (Becton Dickinson cat. no. 7580) at 4°C, overnight. The next step was followed by common  
283 immunofluorescence staining procedure.

284

#### 285 2.13. Protein overexpression of *eggpl* in *Sf9* cell line *in vitro*

286 Briefly, the ORF of *eggpl* was inserted into vector piztv5-His (Novagen) in our laboratory to overexpress *eggpl*, and  
287 cell co-transfection was carried out using FuGENE HD Transfection Reagent (Promega). Then, *Sf9* cell line was maintained  
288 at 28 °C in 25 cm<sup>2</sup> culture flasks (Nest, China) in Grace's insect cell culture medium containing 10% fetal bovine serum  
289 (Gibco, USA).

290

#### 291 2.14. Statistical analysis



292 All data were analyzed by one-way ANOVA with *Duncan's* multiple range test (DMRT) using a SAS statistical  
293 windows 8.1 package program (Microsoft, USA).  $p < 0.05$  was considered to be statistically significant.

294

### 295 3. Results

#### 296 3.1. Overview of single cell RNA transcriptional atlas of *Drosophila* ovary

297 To characterize the transcriptional profile of ovarian cell types, we performed scRNA-seq on 7-day-old adult  
298 *Drosophila* ovaries by using 10× Genomics Chromium system to complete the complementary DNA (cDNA) synthesis  
299 and amplification, library preparation, and sequencing process (**Fig. 1A**). We then used t-Stochastic-Neighbor Embedding  
300 (t-SNE) in Seurat (24) to reduce the dimensionality and visualize the unsupervised cell distribution and 12 cell clusters  
301 (**Supplementary Fig. 1A**) was first classified based on their unique transcriptional profiles with the default resolution.

302 We further assigned cell types using canonical marker genes and further adjusted the Seurat resolution as needed,  
303 resulting in 24 distinct clusters in total (**Fig. 1 C and D**). The two clusters (cluster6 and cluster8) that expressed the germ  
304 cell marker *vasa* (25) were combined together as one germ cell cluster (**Supplementary Figure 1A**). We further divided  
305 the combined cluster into four subclusters (undifferentiated germ cell, oocyte, early nurse cell and later nurse cells) based  
306 on distinctions between the transcriptional profiles revealed by unsupervised clustering and identification of stage-specific  
307 markers (**Supplementary Fig. 1D**) (**Fig. 2A**). Both *nanos* which is maternally loaded into pole plasm and translated after  
308 fertilization (26) and *osk* which is highly enriched in germ plasm and accumulated in pole cells (27-28) were used to  
309 identify 3 subtypes of pole cell clusters at 0.5 resolution value ( $R=0.5$ ). The stalk cell cluster was enriched in the expression  
310 of *zfh-1* (29), *stl* and *CG46339*, as expected (30). The cluster with upregulation of *Wnt4* and *GstS1* was considered as escort  
311 cell cluster according to the previous report (30). The polar cell cluster was identified by a known marker *upd1* (31) at  
312 default resolution value ( $R=1$ ). Three subpopulations of stretch cells were distinguished by several marker genes, including  
313 *peb* (32), *sosie* (33), *br* (34), *past1*, *Glut4EF* and *Vha16-1* (35) at 0.5 resolution value ( $R=0.5$ ), and the terminal follicle cell  
314 cluster was identified by the expression of *past1*. The expression of *SPARC* and *Jupiter* was used to identify the 1-4 stage  
315 of main body follicle cell (1-4 MBFC) (30). Four subclusters such as MBFC (stg. 9-10A) 1, MBFC (stg. 9-10A) 2, MBFC  
316 (stg. 10B) and cent/post MB 8 were identified by *psd*, *Vml*, *ttk*, *dec-1*, *bond* and *Fcp3C* (35) at 0.5 resolution value ( $R=0.5$ ).  
317 The MBFC (stg. 12) and MBFC (stg. 14) were easily identified by maker genes such as *Femcoat*, *Ilp8* and *yellow-g* at 0.5  
318 resolution value ( $R=0.5$ ). The well-recognized marker genes *Hlm* and *su(r)* were used to identify hemocyte and  
319 plasmatocyte respectively (35, 36).

320

#### 321 3.2. Identification of GSC cluster and 2 distinct undifferentiated germ cell subpopulations

322 To refine our previous clustering results, the GSC differentiation-related markers, such as *bam*, *bgen*, *blanks* and *cycE*  
323 (30, 37), were used to identify undifferentiated germ cells, while *egg*, *put* and *cona*, which were known to be required in  
324 GSC maintenance and oogenesis (38-41), were used to identify the later stages. The enrichment of *c(3)G*, *Iswi* and *mael*  
325 was observed in the undifferentiated germ cell, early nurse cell and oocyte clusters, additionally, *CG15628* was observed  
326 specifically in the oocyte (**Fig. 2C**).

327 To characterize the spatial and temporal changes in transcription that occur during the initial stages of germ cell  
328 differentiation, we used Monocle3 to construct the developmental trajectory of the 4 germ cell clusters (**Supplementary**  
329 **Fig. 1C**). This analysis produces a graph-based trajectory called pseudotime that predicts the transcriptomic changes along  
330 the putative timing of developmental process (42). In this case, 4 germline clusters were arranged into a linear trajectory  
331 consisting of 3 branches, which is consistent with the continuous progression of germline development. We identified a

332 subset of *bam*<sup>-</sup> cells at one end of the trajectory that we concluded were GSCs (**Fig. 2B-B'**), and we assigned the remaining  
333 non-*bam* expressing cells and *bam*-positive cells to two distinct undifferentiated germ cell subclusters, namely  
334 undifferentiated germ cell-1 and undifferentiated germ cell-2. To further investigate the hypothesis and examine the  
335 putative GSC cluster, we plotted the GSC-related gene expression in pseudotime. Similar expression profiles of functional  
336 GSC differentiation genes (*bam*, *bgn*, *out*, *twin* and *Set1*) (43-46) and GSC maintenance genes (*aret*, *Mei-P26*, *egg*, *Myc*  
337 and *Hrb98DE*) (47-51) were showed in trajectory (**Fig. 2D**). Consistent with our expectations, we observed low expression  
338 of genes associated with differentiation and high expression of genes associated with self-renewal, while their expression  
339 patterns along the trajectory were gradually changed over time. The expression patterns of top 5 expressed genes in three  
340 germline subclusters suggested that the developmental states of cells in GSC cluster and undifferentiated germ cell-1 cluster  
341 were similar to each other but different from that of the undifferentiated germ cell-2 cluster (**Fig. 2C**).

342

### 343 3.3. Construction of gene regulatory network in GSC

344 Although a large number of genes are expressed in all germ cells, some genes that are differentially expressed during  
345 early germ cell development may play more important role for GSC fate. To identify these types of genes, we conducted a  
346 comparative analysis on the transcriptional profile of 6 germ cell subclusters. We identified subsets of genes in the  
347 germline-1 and -2 clusters, early nurse cell cluster, oocyte cluster and later nurse cell cluster, that are differentially expressed  
348 compared to the GSC cluster (**Fig. 3A**). In addition, we performed an RNAi screen of 33 differentially upregulated genes  
349 in GSCs vs undifferentiated germline-1 and GSCs vs undifferentiated germline-2 clusters by using *nos-Gal4/CyO;tub-*  
350 *Gal80<sup>ts</sup>/TB*, a temperature-sensitive fly line, to individually trigger the available UAS-RNAi lines at adult stage. We found  
351 that RNAi knockdown of 19 upregulated genes induced disruption of GSCs/CBs homeostasis. Of these, 12 genes were  
352 classified as “changes to the number of GSC/CB”, 6 genes as “empty germarium” and 4 genes exhibited “differentiation  
353 defects” (**Fig. 3B-C**). Lastly, we scored the differentially expressed genes (score > 980) and constructed an interaction  
354 network (**Fig. 3D**). This analysis revealed a dense network of interactions between the differentially expressed genes, with  
355 genes that regulate translation (*eIF2gamma*, *Ns1*, and *Prp19*) forming major nodes. In addition, we found that RNAi  
356 knockdown of 21 out of 39 most highly expressed genes also caused a significant increase or decrease in the number of  
357 GSC/CB per germarium. (**Supplementary Fig. 2A-B**).

358 To identify the transcription factor-based gene regulatory network in different kinds of germ cells, we applied SCENIC  
359 analysis to our single-cell RNA sequencing data with 6 known germ cell types. The analysis revealed that the Dref, mal-f,  
360 Hsf, and REPTOR-BP regulons were enriched in GSC cluster, suggesting that they may play an important role in the  
361 regulation of early GSC development (**Fig. 3E**). GO and KEGG enrichment analysis provided additional information about  
362 the biological processes that are enriched during germ cell development. Specifically, we found that the enriched GO terms  
363 were closely related to the basic physiology of *Drosophila* such as cellular metabolic process, protein catabolic process,  
364 cytoskeleton organization and cell cycle. Notably, a proportion of functional GO terms in GSC cluster was particularly  
365 enriched in ubiquitin-dependent protein catabolic process and cellular catabolic process, which was in relation to cancer  
366 and disorder research (52-53) (**Supplementary Fig. 2C**). The top 10 pathways in the KEGG enrichment analysis revealed  
367 that the differentially expressed genes in GSC, undifferentiated germ cell-1 and -2 were significantly enriched for DNA  
368 replication and disease related pathways, while early nurse cell, oocyte and later nurse cell specifically enriched in the  
369 pathway of ribosome, Hippo signaling pathway and MAPK signaling pathway (**Supplementary Fig. 2D**).

370

### 371 3.4. Validation of candidate markers genes in germ cell

372 To identify new markers of distinct stages of germ cell differentiation, we selected 10 candidate genes that are  
373 predicted to be expressed in GSCs by pseudotime analysis and assayed their expression patterns by *in situ hybridization*.  
374 These included 9 GSC specific markers and 1 germline cysts marker (**Fig. 4A**). We identified seven genes that were  
375 specifically expressed in the anterior tip of the germarium, where the GSCs are located, including one gene, *CG32814*,  
376 which we named *eggplant* (*eggpl*) because knockdown causes an enlarged ovary with many retained eggs, as described  
377 below (**Fig. 4B**). To validate these expression patterns at the protein level, we generated antibodies against two genes, the  
378 basal transcription factor TfiIA-S (54) and *Eggpl*. Indeed, we found that the immunofluorescence signals of both antibodies  
379 were highly enriched in GSC and early germ cells, consistent with our *in situ hybridization* results (**Fig. 4C, E**). TfiIA-S  
380 was localized to the nucleus, as expected for a transcription factor, whereas the *Eggpl* was enriched in the cytoplasm, which  
381 we confirmed *in vitro* using the *Sy9* cell line (**Fig. 4F**). In addition to these genes with highly specific expression patterns,  
382 we also found that *hang*, a conserved regulator of ethanol tolerance (55), is expressed in germ cells throughout the  
383 germarium, and that *CG7255* is expressed in germ cell cysts and nurse cells but not in GSCs. These expression patterns  
384 also align with the order of expression of *eggpl*, *hang* and *CG7255* predicted by pseudotime analysis (**Fig. 4D**).

385

### 386 3.5. The unique expression patterns of *eggpl* in germline

387 To further characterize the cells that express *eggpl*, we co-labeled for *eggpl* mRNA and either  $\alpha$ -Spectrin protein,  
388 which localizes to a cytoplasmic structure that is spherical in GSCs (called “spectrosomes”) and elongates to “fusomes” in  
389 cystoblasts (**56**), or the germ cell-specific protein, Vasa (**Fig. 5A-B**). We found that *eggpl* mRNA was specifically enriched  
390 in GSCs. To confirm this observation, we probed for *eggpl* in a *bam-GFP* line. Indeed, we found that *eggpl* transcript was  
391 enriched in the Bam-GFP<sup>+</sup> cells at the anterior tip of the germarium, consistent with GSC-specific expression (**Fig. 5D**).

392 To assess the pattern of *Eggpl* protein expression, we constructed an *eggpl::GFP* line in which GFP was knocked  
393 into the endogenous locus (**Supplementary Fig. 3 A**). We co-stained for GFP and  $\alpha$ -Spectrin, pMad (**Fig. 5E**) or anti-Bam  
394 (**Fig. 5F**) and found that, in contrast to the *eggpl* mRNA expression pattern, *Eggpl::GFP* was detectable in germ cells  
395 throughout Region 1 (**Fig. 5E**). Interestingly, *Eggpl::GFP* protein levels varied by stage, with the highest level of expression  
396 in the cells just downstream from the GSC niche (**Fig. 5L-M**). Thus, the range of protein expression was broader than the  
397 range of mRNA expression and protein levels and was actually highest in cells that have no detectable *eggpl* transcript. In  
398 addition, we constructed a *UAS-eggpl-GFP* line and examined the overexpression pattern of *eggpl* by using mRNA *in situ*  
399 *hybridization* (**Fig. 5G and 5I**). The result showed broad expression of *eggpl* in Region 1 of the overexpression line.  
400 Together, these results suggest that there are distinct layers of regulation of *eggpl* gene expression at the mRNA and protein  
401 levels.

402

### 403 3.6. Ectopic Expression of *eggpl* affects the differentiation of Germline Stem Cells and Cystoblasts

404 To determine whether *eggpl* is involved in the regulation of GSC fate, we expressed *UAS-eggpl-RNAi* and *UAS-eggpl-*  
405 *GFP* lines with *nos-Gal4;tub-Gal80<sup>ts</sup>* line when the adult flies emerged from pupae, and stained for pMad and  $\alpha$ -Spectrin  
406 to identify GSC and early germ cells (**Fig. 5H**). With this combination of markers, GSCs were identified as cells at the tip  
407 of the germarium that have high levels of pMad and spherical  $\alpha$ -Spectrin<sup>+</sup> spectrosomes whereas the differentiating  
408 germline cysts (2-, 4-, 8- and 16-cell) have low levels of pMad and  $\alpha$ -Spectrin<sup>+</sup> interconnecting branched fusomes (56). We  
409 did not observe a significant difference in GSC or CB number upon knockdown of *eggpl* (**Fig. 5J**) but found an increase  
410 in branched cysts (2-cell and 4-cell stages) upon knockdown of *eggpl* (**Fig. 5K**). To further study *eggpl* function, we  
411 generated an *eggpl* allele, *eggpl<sup>11</sup>*, using CRISPR. *Eggpl* protein was undetectable in *eggpl<sup>11</sup>* germaria (**Fig. 5N**), indicating

412 that the allele disrupts protein expression. Consistent with our RNAi results, both the number of GSC and the number of  
413 CB were not affected (**Fig. 6E-F**) in *eggpl<sup>Δ1</sup>*, while the number of germline cysts in the 2-cell to 8-cell stages was  
414 significantly increased (**Fig. 5O-P**). Taken together, these results indicate that *eggpl* is required for GSC differentiation in  
415 *Drosophila* ovary.

416

417 *3.7. The expression of eggpl in GSCs and primordial germ cells (PGCs) in both ovary and testis at different developmental*  
418 *states.*

419 Many genes regulate germ cell differentiation in both males and females, and, indeed, we found that *eggpl* is also  
420 expressed in male GSCs and early spermatogonia (**Fig. 6C**). Since the *Drosophila* GSCs are derived from a small  
421 population of primordial germ cells (PGCs) with undifferentiated states, the profiles of gene expression in PGCs may vary  
422 from that of the adult. To detect whether the expression of *eggpl* may be more widely exhibited in germline lineage from  
423 larvae to adult, we dissected the gonads from male and female larvae in *eggpl* knock-in lines, and stained with anti- $\alpha$ -  
424 Spectrin and anti-Vasa to label the PGCs and germ cells. We found that *eggpl* is expressed in both male and female larvae  
425 PGCs and early undifferentiated germ cells (**Fig. 6B and 6D**), suggesting that *eggpl* may function at these early stages as  
426 well. In the testes of wild type male flies, GSC were present next to the apical tip of testes and gradually differentiated into  
427 spermatogonial cells with germline specific branched organelle fusomes. While we found that the distance of branched  
428 fusomes from the hub cells in *eggpl* knock-out testes is significantly ( $p < 0.01$ ) less as compared to those in control (**Fig.**  
429 **6E-F**). This finding suggested an early onset of premature differentiation of GSCs in the testes when *eggpl* was lost.

430

431 *3.8. Depression of eggpl increases egg production and regulates germ cell proliferation*

432 Since the disruption of *eggpl* led to an increase in the frequency of germ cell cysts, we examined the oviposition on  
433 *eggpl-RNAi* and *eggpl<sup>Δ1</sup>* lines, and found a significant increase in the number of eggs laid by flies with RNAi knockdown  
434 of *eggpl* in germ cells compared to sibling controls. (**Fig. 7B**). In addition, we noticed that the size of the whole ovary and  
435 the number of mature eggs per ovary were substantially increased upon RNAi and knock out of *eggpl* in germ cells at 2-,  
436 7-, and 14-day-old flies but returned to a size that is comparable to wildtype by 21-days (**Supplementary Fig. 3 B**). Based  
437 on this phenotype, we named the gene *eggplant*. Furthermore, we surmised that *eggpl* could be involved in the regulation  
438 of proliferation. To test this possibility, we assayed for proliferation in germ cells using a BrdU incorporation assay, which  
439 identifies cells in S-phase (**Fig. 7A**). Compared with wild type fed on standard diet, the average number of BrdU<sup>+</sup> cysts  
440 was significantly increased in germ cell cysts in wild type fed on rich yeast diet, *eggpl-RNAi* (on standard or Rich diet),  
441 and *eggpl<sup>Δ1</sup>* (on standard or Rich diet) lines respectively (**Fig. 7C**).

442 The increase in ovary size and GSC proliferation that we observed upon knockdown of *eggpl* phenocopies the  
443 response of ovaries to a rich protein diet, (i.e. daily feeding of wet yeast paste). This suggests that the wet yeast diet may  
444 be promoting oogenesis in part by repressing *eggpl* expression. To test this hypothesis, we compared the ovaries from  
445 control and *eggpl<sup>Δ1</sup>* that were maintained on standard food or standard food plus wet yeast paste. The ovary size of the  
446 control flies was substantially increased by the addition of wet yeast paste, consistent with previous reports (**16**).  
447 Interestingly, we found that the ovary size and number of eggs in *eggpl* knockout lines maintained on either standard food  
448 alone or on standard food with wet yeast were comparable to the controls that were maintained with wet yeast paste (**Fig.**  
449 **7F-G**). In addition, we found that the intensity of *eggpl* signal was significantly decreased in flies that were maintained  
450 with wet yeast paste (**Fig. 7D-E**). Wet yeast paste in the diet is known to promote increased egg production by signaling to  
451 the GSC niche through the insulin pathway. Therefore, taken together, these observations suggest a model in which a high

452 yeast diet promotes GSC proliferation and increased egg production by inhibiting the expression of *eggpl* in GSCs and  
453 early germ cells, perhaps downstream of insulin signaling.

454

455 *3.9. The eggpl mediates GSC differentiation via the MMP-dependent Timp regulation.*

456 The extracellular matrix (ECM) is an important remodeling component of ovarian niche, which is responsible for the  
457 cellular organization, cell-matrix adhesion and tissue stiffness (57). It is composed of Laminins, Perlecan, Collagen IV,  
458 Glutatin and mucin-type O-glycoproteins (58-59), and the ECM composition is regulated by a family of proteolytic  
459 enzymes, matrix metalloproteinases (MMPs) (60). Tissue inhibitors of metalloproteinases (TIMPs) mediate the inhibition  
460 of MMP activity, which is accomplished by blocking the MMPs catalytic domain with the amino and carbonyl groups of  
461 the TIMP N-terminal cysteine residue (61). We hypothesized that it may be regulated by MMP-dependent *Timp* signaling  
462 in the early GSC lineage. To test this hypothesis, we assayed for changes in Eggpl protein levels upon overexpression and  
463 RNAi knockdown of MMP-Timp related genes. We found that the fluorescence intensity of Eggpl protein levels were  
464 decreased upon *Timp* knockdown, and increased when *Timp* was overexpressed. In addition, overexpression of either *Mmp1*  
465 or *Mmp2* decreased the fluorescence intensity of Eggpl protein level. Conversely, Eggpl protein levels were slightly  
466 increased upon *Mmp1* RNAi (**Fig. 8A**). Interestingly, RNAi knockdown of *Timp* and *Mmp1/2* overexpression caused an  
467 enlarged ovary phenotype, similar to the phenotype we observed upon RNAi knockdown of *eggpl*, while *Timp*  
468 overexpression and RNAi knockdown of *Mmp1* did not affect ovary size (**Fig. 8B-C**). Collectively, these results support a  
469 model in which *eggpl* mediates the GSC differentiation process *via* MMP-dependent Timp regulation pathway (**Fig. 8D**).

470

#### 471 **4. Discussion**

472 Decades of research have established the *Drosophila* female germline stem cell as a favorable system to understand  
473 germ cell and stem cell biology. The GSCs are required in germarium to support continuous production of differentiating  
474 germ cells throughout most of adulthood. The GSCs are typically identified by their localization at the anterior tip of the  
475 germarium (62), and the presence of spectrosomes or high pMad-signal (63), and many other useful marker genes have  
476 also been described. For example, the expression of *Lamin C*, a typical marker, is strongly expressed in TF cells, displays  
477 the weak expression in cap cells, and is not detectable in escort cells. Conversely, *traffic jam (tj)* is highly expressed in  
478 escort cell and cap cells, but not detectable in TF cells (64). These markers facilitate many tissue- and cell type-specific  
479 genetic manipulations *in vivo*, which can be used to understand the gene functions and signaling pathways that regulate  
480 germ cell differentiation. Therefore, discovery of specific marker genes in GSCs will have many applications in the study  
481 of germ cell and stem cell biology. However, it has been difficult to identify new markers of GSCs, in part because they  
482 are rare in wildtype tissue, and thus not amenable to bulk sequencing approaches. In our study, we performed 10×single  
483 cell transcriptomes sequencing on whole ovary, and identified 24 distinct cell populations by using known marker genes  
484 (**Fig. 1C-D**). Taking into account the variation of the sample, we compared our data with 4 public *Drosophila* ovary scRNA-  
485 seq datasets (30, 65). The plotting results showed that our dataset is well integrated with others (**Supplementary Fig. 1 B**).  
486 Here, we analyzed the 175 cells in the GSC cluster to identify individual genes and gene regulatory networks that may be  
487 important for GSC function. This approach produced a list of genes that is highly enriched for genes that produce a  
488 phenotype when knocked down in germ cells by RNAi or that have a specific expression pattern in the early GSC lineage.  
489 This validates the approach and provides a new resource for the community.

490 The evolutionarily conserved insulin-like growth factor (IGF) pathway has multiple roles in the modulation of GSC  
491 proliferation and maintenance. A protein-rich diet induces the production of insulin-like peptides (DILPs) in the brain,

492 which regulate GSC division and cyst growth on a protein-rich diet (14). Several intracellular signals have been identified  
493 that function downstream of insulin signaling in germ cells. These include phosphoinositide-3 kinase (PI3K), *dFOXO*, and  
494 cell cycle factors, such as *CycA*, *CycB*, *CycE* and *E2F1* (66, 67). However, little is known about the gene targets of this  
495 pathway that modulate the rate of differentiation. Our findings that a rich yeast diet causes a decrease in *eggpl* expression  
496 and that knockdown or knockout of *eggpl* mimics the effects of a rich yeast diet on the ovary raises the interesting  
497 possibility that *eggpl* may be a key link between nutritional cues and the regulation of oogenesis (**Fig. 7C-G**). It is  
498 interesting that knockdown or knockout of *eggpl* is sufficient to induce such a substantial increase in egg laying on standard  
499 food without yeast supplementation. This suggests that protein in the diet is not the limiting factor under these conditions.

500 As the endogenous inhibitors of MMPs activities, TIMPs have been reported to regulate a series of cellular processes  
501 including neurite differentiation, apoptosis and cell division (68-70). Increasing evidence indicates that Timp-mediated  
502 inhibition of MMP activity in the extracellular matrix could reduce hepatocyte proliferation in a murine regeneration model  
503 (**71**). In *Drosophila*, the regulation of MMPs (*Mmp1* and *Mmp2*) activity by inhibitory TIMP plays a key role in tissue  
504 stiffness and ovarian niche organization. For instance, *timp* regulates the distribution of *Mmp1* and *Mmp2*, which could  
505 maintain GSC niche homeostasis and interfollicular stalk formation. The *loss of timp* causes the defects on organization of  
506 germline cysts (**57**). Recently, it has been shown that mRNA expression of *timp* strongly enriched in the place where GSCs  
507 reside, and the *Mmp1* and *Mmp2* protein accumulated in the most anterior of germarium (57, 72). Our results suggest that  
508 *Eggpl* in early germ cell may be mediated by MMP-dependent Timp pathway (**Fig. 8A**). Further investigation will be  
509 needed to explore how TIMP dependent inhibition of MMP regulates GSC division and whether TIMP functions  
510 independent of MMP inhibition in germ cells.

511 Taken together, our research aimed to unveil the developmental features of GSCs. The bioinformatics analysis allowed  
512 us to obtain the transcriptomes of 175 GSCs, and provided a transcriptional perspective of two distinct undifferentiated  
513 germ cell clusters. The novel GSCs marker genes validated in this study were beneficial to better understand the signature  
514 of stem cell lineage. We further introduced a GSC specific functional gene, *eggpl*, and explored its gene function in GSC  
515 differentiation progress. On the other hand, the combination of differentially expression gene analysis and RNAi screen  
516 allowed us to gain a better understanding of the potential genetic interactions between genes involved in GSC maintenance  
517 and differentiation.

518

## 519 **Acknowledgements**

520 This work was supported by National Natural Science Foundation of China (No. 31572335). T.G.N is supported by a  
521 grant from the National Institutes of Health (GM136348). We gratefully thank Guangzhou Genedenovo Biotechnology Co.,  
522 Ltd for the assistance in sequencing and bioinformatics analysis. Specially thank for the generous help and professional  
523 guidance provided by Suning Liu (South China Normal University, China).

524

## 525 **Conflicts of Interest**

526 The authors declare no conflict of interest.

527

528

529 **References**

- 530 (1) Flores H A , Dumont V , Fadoo A , et al. Adaptive Evolution of Genes Involved in the Regulation of Germline Stem  
531 Cells in *Drosophila melanogaster* and *D. simulans*[J]. *G3-Genes Genomes Genetics*, 2015, 5(4).
- 532 (2) Yoshinari Y , Ameku T , Shu K , et al. Neuronal Octopamine Signaling Regulates Mating-induced Germline Stem Cell  
533 Increase in Female *Drosophila melanogaster*[J]. *eLife Sciences*, 2020, 9:e57101.
- 534 (3) Merkle J A , Hinnant T D . Coordinating Proliferation, Polarity, and Cell Fate in the *Drosophila* Female Germline[J].  
535 *Frontiers in Cell and Developmental Biology*, 2020, 8.
- 536 (4) Dansereau D A , Lasko P . The Development of Germline Stem Cells in *Drosophila*[J]. Humana Press, 2008.
- 537 (5) Tomotsune A , Ryusuke N , Liliane S . Mating-Induced Increase in Germline Stem Cells *via* the Neuroendocrine System  
538 in Female *Drosophila*[J]. *PLOS Genetics*, 2016, 12(6):e1006123-.
- 539 (6) Wang L , Cai L Y . The JAK/STAT Pathway Positively Regulates DPP Signaling in the *Drosophila* Germline Stem Cell  
540 Niche[J]. *Journal of Cell Biology*, 2008, 180(4):721-728.
- 541 (7) Drummond-Barbosa D . Local and Physiological Control of Germline Stem Cell Lineages in *Drosophila*  
542 *melanogaster*[J]. *Genetics*, 2019, 213.
- 543 (8) Schulz C , Wood C G , Jones D L , et al. Signaling from Germ Cells Mediated by the Rhomboid Homolog Stet Organizes  
544 Encapsulation by Somatic Support Cells[J]. *Development*, 2002, 129(19):4523-4534.
- 545 (9) Jin S , Wei H M , Xu J , et al. Histone H1-mediated Epigenetic Regulation Controls Germline Stem Cell Self-renewal  
546 by Modulating H4K16 Acetylation[J]. *Nature Communications*. 2015, 6:8856
- 547 (10) Buszczak M , Paterno S , Spradling A C . *Drosophila* Stem Cells Share A Common Requirement for the Histone H2B  
548 Ubiquitin Protease Scrawny[J]. *Science*, 2009, 323(5911).
- 549 (11) Wang X , Pan L , Wang S , et al. Histone H3K9 Trimethylase Eggless Controls Germline Stem Cell Maintenance and  
550 Differentiation[J]. *PLoS Genetics*, 2011, 7(12):e1002426.
- 551 (12) Maines J Z , Park J K , Williams M , et al. Stonewalling *Drosophila* Stem Cell Differentiation by Epigenetic  
552 Controls[J]. *Development*, 2007, 134(8):1471-1479.
- 553 (13) Li Y , Zhang Q , Carreira-Rosario A , et al. Mei-P26 Cooperates with Bam, Bgcn and Sxl to Promote Early Germline  
554 Development in the *Drosophila* Ovary[J]. *Plos One*, 2013, 8(3), p.e58301.
- 555 (14) LaFever, Leesa, Drummond-Barbosa, et al. Direct Control of Germline Stem Cell Division and Cyst Growth by Neural  
556 Insulin in *Drosophila*[J]. *Science*, 2005.
- 557 (15) Hsu H J , Lafever L , Drummond-Barbosa D . Diet Controls Normal and Tumorous Germline Stem Cells via Insulin-  
558 Dependent and -Independent Mechanisms in *Drosophila*[J]. *Developmental Biology*, 2008, 313(2):700-712.

- 559 (16) Drummond-Barbosa D , Spradling A C . Stem Cells and Their Progeny Respond to Nutritional Changes during  
560 *Drosophila* Oogenesis.[J]. Developmental Biology, 2001, 231(1):265-278(17) Su Y H , Rastegri E , Kao S H , et al. Diet  
561 regulates Membrane Extension and Survival of Niche Escort Cells for Germline Homeostasis via Insulin Signaling[J].  
562 Development, 2018, 145(7):dev.159186.
- 563 (18) Hsu H J , Drummond-Barbosa D . Insulin Levels Control Female Germline Stem Cell Maintenance via the Niche in  
564 *Drosophila*[J]. Proceedings of the National Academy of Sciences of the United States of America, 2009, 106(4):1117-1121.
- 565 (20) Y Fu, X Huang, P Zhang, et al. Single-cell RNA Sequencing Identifies Novel Cell Types in *Drosophila* Blood[J].  
566 Journal of Genetics and Genomics, 2020, 47(4).
- 567 (21) Avila Cobos, F., Vandesompele, J., Mestdagh, P. and De Preter, K.,. Computational Deconvolution of Transcriptomics  
568 Data from Mixed Cell Populations. Bioinformatics, 2018, 34(11), pp.1969-1979.
- 569 (23) Davie K , Janssens J , Koldere D , et al. A Single-cell Transcriptome Atlas of the Aging *Drosophila* Brain[J]. Cell,  
570 2018, 174(4):1-17.
- 571 (19) Hao Y , Hao S , Andersen-Nissen E , et al. Integrated Analysis of Multimodal Single-Cell Data. Cold Spring Harbor  
572 Laboratory, 2020.
- 573 (20) Laurens V D M , Hinton G . Visualizing Data using t-SNE[J]. Journal of Machine Learning Research, 2008,  
574 9(2605):2579-2605.
- 575 (21) Labun K , Montague T G , Krause M , et al. CHOPCHOP v3: Expanding the CRISPR Web Toolbox beyond Genome  
576 Editing[J]. Nucleic Acids Research, 2019, 47(W1)
- 577 (22) Maurice L , Adams F F , Michelle N , et al. Refined sgRNA Efficacy Prediction Improves Large- and Small-scale  
578 CRISPR–Cas9 Applications[J]. Nucleic Acids Research, 2018(3):3.
- 579 (23) Bassett A , Tibbit C , Ponting C , et al. Highly Efficient Targeted Mutagenesis of *Drosophila* with the CRISPR/Cas9  
580 System[J]. Cell Reports, 2014, 6(6):1178-1179.
- 581 (24) Satija R , Farrell J A , Gennert D , et al. Spatial Reconstruction of Single-cell Gene Expression Data[J]. Nature  
582 Biotechnology, 2015, 33(5):495-502.
- 583 (25) P F, Lasko, Ashburner. The Product of the *Drosophila* Gene *vasa* is Very Ssimilar to Eukaryotic Initiation Factor-  
584 4A.[J]. Nature, 1988, 335: 611–617.
- 585 (26) Deshpande G , Calhoun G , Yanowitz J L , et al. Novel Functions of nanos in Downregulating Mitosis and Transcription  
586 during the Development of the *Drosophila* Germline[J]. Cell, 1999, 99(3):0-281.
- 587 (27) Kim-Ha J , Smith J L , Macdonald P M . *oskar* mRNA is Localized to the Posterior Pole of the *Drosophila*  
588 Oocyte[J]. Cell, 1991, 66(1):23-35.



- 589 (28) Eichler C E , Hakes A C , Hull B , et al. Compartmentalized *oskar* Degradation in the Germ Plasm Safeguards Germline  
590 Development[J]. eLife Sciences, 2020, 9.
- 591 (29) Tatapudy S, Peralta J, Nystul T. Distinct roles of Bendless in regulating FSC niche competition and daughter cell  
592 differentiation. Development. 2021 Nov 15;148(22):dev199630. doi: 10.1242/dev.199630. Epub 2021 Nov 22. PMID:  
593 35020878; PMCID: PMC8645206.
- 594 (30) Rust K , Byrnes L E , Yu K S , et al. A Single-cell Atlas and Lineage Analysis of the Adult *Drosophila* Ovary[J]. Nature  
595 Communications, 2020, 11(1).
- 596 (31) Silver D L , Montell D J . Paracrine Signaling Through the JAK/STAT Pathway Activates Invasive Behavior of Ovarian  
597 Epithelial Cells in *Drosophila*. [J]. Cell, 2002, 107(7):831-841.
- 598 (32) Sun, J. Notch-Dependent Downregulation of the Homeodomain Gene *cut* is Required for the Mitotic Cycle/Endocycle  
599 Switch and Cell Differentiation in *Drosophila* Follicle Cells[J]. Development, 2005, 132(19):4299-308.
- 600 (33) Chaddad, Fabio. *Drosophila sosie* Functions with  $\beta$ H-Spectrin and Actin Organizers in Cell Migration, Epithelial  
601 Morphogenesis and Cortical Stability[J]. Biology Open, 2012, 1(10).
- 602 (34) Tzolovsky G , Deng W M , Schlitt T , et al. The Function of the Broad-Complex During *Drosophila* Oogenesis[J].  
603 Genetics, 1999, 153(3):1371-1383.
- 604 (35) Jevitt A , Chatterjee D , Xie G , et al. A Single-cell Atlas of Adult *Drosophila* Ovary Identifies Transcriptional Programs  
605 and Somatic Cell Lineage Regulating Oogenesis[J]. PLoS Biology, 2020, 18(4):e3000538.
- 606 (36) Li H, Janssens J, De Waegeneer M, et al. Fly Cell Atlas: A Single-nucleus Transcriptomic Atlas of the Adult Fruit Fly.  
607 Science. 2022 Mar 4;375(6584):eabk2432. doi: 10.1126/science.abk2432. Epub 2022 Mar 4. PMID: 35239393; PMCID:  
608 PMC8944923.
- 609 (37) Perinthottathil S , Kim C . Bam and Bgcn in *Drosophila* Germline Stem Cell Differentiation[J]. Vitamins & Hormones,  
610 2011, 87:399-416.
- 611 (38) Clough E , Tedeschi T , Hazelrigg T . Epigenetic Regulation of Oogenesis and Germ Stem Cell Maintenance by the  
612 *Drosophila* Histone Methyltransferase Eggless/dSetDB1[J]. Developmental Biology, 2014, 388(2):181-191.
- 613 (39) Xie T , Spradling A C . decapentaplegic Is Essential for the Maintenance and Division of Germline Stem Cells in the  
614 *Drosophila* Ovary[J]. Cell, 1998.
- 615 (40) Buszczak M , Paterno S , Spradling A C . *Drosophila* Stem Cells Share A Common Requirement for the Histone H2B  
616 Ubiquitin Protease Scrawny[J]. Science, 2009, 323(5911).
- 617 (41) Page S L , Khetani R S , Lake C M , et al. corona is Required for Higher-Order Assembly of Transverse Filaments  
618 into Full-Length Synaptonemal Complex in *Drosophila* Oocytes[J]. Plos Genetics, 2008, 4(9):e1000194.

- 619 (42) Witt E , Benjamin S , Svetec N , et al. Testis Single-cell RNA-seq Reveals the Dynamics of de novo Gene Transcription  
620 and Germline Mutational Bias in *Drosophila*[J]. eLife, 2019, 8:-.
- 621 (43) Ohlstein B , , Lavoie C A , Vef O , , et al. The *Drosophila* Cystoblast Differentiation Factor, Benign Gonial Cell  
622 Neoplasm, is Related to DExH-box Proteins and Interacts Genetically With bag-of-marbles[J]. Genetics, 2000, 155(4):1809.
- 623 (44) Steinhauer W R , Kalfayan L J . A Specific Ovarian Tumor Protein Isoform is Required for Efficient Differentiation  
624 of Germ Cells in *Drosophila* Oogenesis.[J]. Genes & Development, 1992, 6(2):233-43.
- 625 (45) Fu Z , Geng C , Wang H , et al. Twin Promotes the Maintenance and Differentiation of Germline Stem Cell Lineage  
626 through Modulation of Multiple Pathways[J]. Cell Reports, 2015, 13(7):1366-1379.
- 627 (46) Vidaurre V , Chen X . Epigenetic Regulation of *Drosophila* Germline Stem Cell Maintenance and Differentiation[J].  
628 Developmental Biology, 2021, 473.
- 629 (47) Blatt P , Martin E T , Breznak S M , et al. Post-transcriptional Gene Regulation Regulates Germline Stem Cell to  
630 Oocyte Transition During *Drosophila* Oogenesis[J]. Current Topics in Developmental Biology, 2019.
- 631 (48) Rastegari E , Kajal K , Tan B S , et al. WD40 protein Wuho Controls Germline Homeostasis *via* TRIM-NHL Tumor  
632 Suppressor Mei-p26 in *Drosophila*[J]. Development, 2020, 147(2):dev182063.
- 633 (49) Casale A M , Cappucci U , Pia Ce Ntini L . Unravelling HP1 Functions: Post-transcriptional Regulation of Stem Cell  
634 Fate[J]. Chromosoma, 2021:1-9.
- 635 (50) Rhiner C , Diaz B , Portela M , et al. Persistent Competition Among Stem Cells and Their Daughters in the *Drosophila*  
636 Ovary Germline Niche.[J]. Development, 2009, 136(6):995.
- 637 (51) Ji Y , Tulin A V . Poly(ADP-ribose) Controls DE-cadherin-dependent Stem Cell Maintenance and Oocyte  
638 Localization[J]. Nature Communications, 2012, 3:760.
- 639 (52) Yusuke O , Tomoya M , Kosuke A , et al. Defective Autophagy in Vascular Smooth Muscle Cells Enhances Cell Death  
640 and Atherosclerosis[J]. Autophagy, 2018:15548627.2018.1501132.
- 641 (53) Ponnusamyb M P . Stem Cell Research and Cancer Stem Cells[J]. Journal of Tissue Science & Engineering, 2011,  
642 02(3).
- 643 (54) Andersen P R , Tirian L , Vunjak M , et al. A Heterochromatin-dependent Transcription Machinery Drives piRNA  
644 Expression[J]. Nature, 2017, 549(7670):54.
- 645 (55) Scholz H , Franz M , Heberlein U . The Hangover Gene Defines A Stress Pathway Required for Ethanol Tolerance  
646 Development[J]. Nature, 2005, 436(7052):845-7.
- 647 (56) Xie T , Spradling A . The *Drosophila* Ovary: An in vivo Stem Cell System. In Stem Cell Biology (ed. D. R. Marshak  
648 R. L. Gardner and D. Gottlieb), 2001, pp. 129-148. New York: Cold Spring Harbor Laboratory Press.

- 649 (57) Pearson J R , Federico Z , Laura T G , et al. ECM-Regulator *timp* is Required for Stem Cell Niche Organization and  
650 Cyst Production in the *Drosophila* Ovary[J]. PLOS Genetics, 2016, 12(1):e1005763
- 651 (58) A Díaz-Torres, Rosales-Nieves A E , Pearson J R , et al. Stem Cell Niche Organization in the *Drosophila* Ovary  
652 Requires the ECM Component Perlecan[J]. Current Biology, 2021(51).
- 653 (59) Schwientek T , Mandel U , Roth U , et al. A Serial Lectin Approach to the Mucin-type O-glycoproteome of *Drosophila*  
654 *melanogaster* S2 Cells[J]. PROTEOMICS, 2007, 7(18).
- 655 (60) S Shapiro S D . Matrix Metalloproteinase Degradation of Extracellular Matrix: Biological Consequences[J]. Current  
656 Opinion in Cell Biology, 1998, 10(5):602-608.
- 657 (61) Stetler-Stevenson, W. G . Tissue Inhibitors of Metalloproteinases in Cell Signaling: Metalloproteinase-Independent  
658 Biological Activities[J]. Science Signaling, 2008, 1(27):re6.
- 659 (62) J Shi, Jin Z , Yu Y , et al. A Progressive Somatic Cell Niche Regulates Germline Cyst Differentiation in the *Drosophila*  
660 Ovary[J]. Current Biology, 2020, 31(4).
- 661 (63) Xie T . Control of Germline Stem Cell Self-renewal and Differentiation in the *Drosophila* Ovary: Concerted Actions  
662 of Niche Signals and Intrinsic Factors[J]. Wiley Interdisciplinary Reviews: Developmental Biology, 2013, 2(2).
- 663 (64) Trupti P , Chen X , Ekaterina A , et al. Specification and Spatial Arrangement of Cells in the Germline Stem Cell Niche  
664 of the *Drosophila* Ovary Depend on the Maf Transcription Factor *Traffic jam*[J]. Plos Genetics, 2017, 13(5):e1006790.
- 665 (65) Slaidina M , Gupta S , Lehmann R . A Single Cell Atlas Reveals Unanticipated Cell Type Complexity in *Drosophila*  
666 Ovaries [J]. Genome research, 2021, 31(10):1938-1951.
- 667 (66) Hinnant T D , Alvarez A A , Ables E T . Temporal Remodeling of the Cell Cycle Accompanies Differentiation in the  
668 *Drosophila* Germline[J]. Developmental Biology, 2017:S0012160617300763.
- 669 (67) Kahney E W , Snedeker J C , Chen X . Regulation of *Drosophila* Germline Stem Cells[J]. Current Opinion in Cell  
670 Biology, 2019, 60:27-35.
- 671 (68) Perez-Martinez L, Jaworski DM. Tissue Inhibitor of Metalloproteinase-2 Promotes Neuronal Differentiation by Acting  
672 as An Anti-mitogenic Signal. Journal of Neuroscience 2005;25:4917–4929.
- 673 (69) Ahonen M, Poukkula M, Baker AH, Kashiwagi M, Nagase H, Eriksson JE, Kahari VM. Tissue Inhibitor of  
674 Metalloproteinases-3 Induces Apoptosis in Melanoma Cells by Stabilization of Death Receptors. Oncogene 2003;22:2121–  
675 2134.
- 676 (70) Nemeth JA, Rafe A, Steiner M, Goolsby CL. TIMP-2 Growth-stimulatory Activity: A Concentration- and Cell Type-  
677 Specific Response in the Presence of Insulin. Experimental Cell Research 1996;224:110–115.
- 678 (71) Mohammed FF, Pennington CJ, Kassiri Z, Rubin JS, Soloway PD, Ruther U, Edwards DR, Khokha R.

679 Metalloproteinase Inhibitor TIMP-1 Affects Hepatocyte Cell Cycle via HGF Activation in Murine Liver Regeneration.

680 Hepatology 2005;41:857–867.

681 (72) Wang X, Page-McCaw A. A Matrix Metalloproteinase Mediates Long-distance Attenuation of Stem Cell Proliferation.

682 J Cell Biol. 2014; 206(7):923–36.

683

684

685 **Figure legends**

686 **Fig. 1. 10×Genomics single-cell RNA sequencing on adult *Drosophila* ovary.**

687 (A) Schematic of experimental workflow for cell capture and single cell data analysis. (B) Illustration of a *Drosophila*  
688 ovariole, describing asymmetric divisions of GSCs and CB, which divide four times to produce developing germline cysts.  
689 By region 2b, 16-cell cyst was completely formed and surrounded by follicle cells. As the cyst moves down to region 3,  
690 the egg chamber containing 1 oocyte and 15 nurse cells is formed and ready to bud off. The *vasa-EGFP* line was used to  
691 visualize all germ cells along germline. Anti-pMad (red) was used to label GSCs (asterisk), while anti- $\alpha$ -Spectrin (blue)  
692 was used to stain spectrosomes (round dot) and branched fusomes. (C) The t-SNE plot of 24 distinct cell clusters marked  
693 with different colors. (D) The dot plot of scaled expression of selected typical marker genes in each cell type.

694

695 **Fig. 2. The identification of GSCs and germ cell subclusters.**

696 (A) tSNE plot revealing 4 germ cell subclusters, undifferentiated germ cells (red), early nurse cells (green), oocytes (blue)  
697 and later nurse cells (purple). (B-B') The monocle analysis reveals the developmental linear trajectory of germ cells, and  
698 the putative GSCs population was distinguished in non-bam expressing germ cells which located in the beginning of  
699 trajectory. Arrows indicate the direction of differentiation. (C) To assign identities to these germ cell subclusters, the violin  
700 plots were used to visualize the distribution of normalized typical marker genes expression levels. (D) The expression of  
701 GSC maintenance genes (*aret*, *Mei-P26*, *egg*, *Myc* and *Hrb98DE*) and differentiation genes (*bam*, *bgn*, *out*, *twin* and *Set1*)  
702 along the primary branch (dotted circle line) in pseudotime. (E) The dot plot presents the respective top 5 genes in the  
703 GSCs, undifferentiated germ cell-1, undifferentiated germ cell-2, early nurse cells, oocytes and later nurse cells. The dot  
704 diameter represents the percentage of cell expressing top genes.

705

706 **Fig. 3. The construction of gene regulatory network in GSCs.**

707 (A) The Venn diagram of the number of differentially expressed gene. (B) The statistical analysis of the average number  
708 of GSC and CB in RNAi lines of screened differentially expressed gene. Error bars show SEM, ns indicates no significant  
709 difference, \* $P < 0.05$ , \*\* $P < 0.01$ , \*\*\* $P < 0.001$ . (C) The typical phenotypes of germaria in selected RNAi lines stained with  
710 anti- $\alpha$ -Spectrin (green) and anti-pMad (red). (D) The construction of gene interaction network by using *Cytoscape 3.9.1*  
711 software. (E) The heat map of SCENIC analysis on GSC, undifferentiated germ cell-1, undifferentiated germ cell-2, early  
712 nurse cell, oocyte and later nurse cell subclusters.

713

714 **Fig. 4. The validation of GSC marker genes.**

715 (A) The dot plot showing the expression of selected specific marker genes in each subclusters. The color intensity from  
716 dark to light represents the average normalized gene expression level. (B) The expression patterns of candidate marker  
717 genes was validated by using *in situ hybridization*. (C-C') Immunofluorescence staining with anti-TfIIA-S on wild type  
718 and *nos-Gal4 > UAS-TfIIA-S-RNAi* (negative control). (D) The expression profiles of *eggpl*, *CG7255* and *hang* along the  
719 trajectory branches in pseudotime. (E-E') Immunofluorescence staining with anti-eggpl on wild type and *nos-Gal4 > UAS-*  
720 *eggpl-RNAi* (negative control) ovary. (F) The overexpression of GFP (green) and *eggpl* in *Sf9* cell line *in vitro*. The anti-  
721 *eggpl* (red) was used to detect the *eggpl* protein, and Hoechst (blue) was used to label the nucleus.

722

723 **Fig. 5. The characteristics of *eggpl* expression in ovarian germline.**

724 (A-A') The mRNA *in situ hybridization* of *eggpl* (green) on wild type and *nos-Gal4 > UAS-eggpl-RNAi* (negative control)  
725 line. (B-C) Immunofluorescence staining with anti- $\alpha$ -Spectrin (red) and anti-Vasa (red) on *eggpl-in situ* (green) labeled

726 tissues respectively. **(D)** The mRNA *in situ* hybridization of *eggpl* (green) on *bam-GFP* line stained with GFP (red). **(E)**  
727 Immunofluorescence staining with anti- $\alpha$ -Spectrin (blue), anti-pMad (red) and GFP (green) on the *eggpl::GFP knock-in*  
728 line. **(F)** The anti-GFP, anti- $\alpha$ -Spectrin (red) and anti-Bam (blue) were used to stain on *eggpl::GFP knock-in* line. **(G and**  
729 **I)** The mRNA *in situ* hybridization of *eggpl* (green) on *nos-Gal4*> (negative control) and *nos-Gal4>UAS-eggpl-GFP* lines.  
730 **(H)** The phenotypes of wild type, *nos-Gal4>UAS-eggpl-RNAi* line and *nos-Gal4>UAS-eggpl::GFP* line staining with anti-  
731  $\alpha$ -Spectrin (green), anti-pMad (red). **(J)** The average number of GSC and CB in *nos-Gal4* line, *nos-Gal4>UAS-eggpl-RNAi*  
732 line and *nos-Gal4>UAS-eggpl::GFP* line on 2 day, 7 day, 14 day and 21 day. **(K)** The average number of differentiating  
733 germline cysts in three types of fly lines. **(L)** Quantification of the GFP intensity mean in *eggpl::GFP knock-in* line, n=11.  
734 **(M)** Image illustrating the image segmentation used to quantify the expression pattern of *eggpl*. **(N)** Immunofluorescence  
735 staining of an *eggpl<sup>l1</sup>* germlarium with anti-*eggpl* antibody showing a lack of signal. **(O)** The typical phenotype of *eggpl<sup>l1</sup>*  
736 germlarium staining with anti- $\alpha$ -Spectrin (green), anti-pMad (red). **(P)** The statistical analysis of the average number of  
737 GSC and CB and Cysts in *eggpl<sup>l1</sup>* line. Error bars show SEM, ns indicates no significant difference, \*\*\* $P$ <0.001.

738

### 739 **Fig. 6. The dynamical expression of *eggpl* in testis and ovary.**

740 **(A)** Immunofluorescence staining with anti- $\alpha$ -Spectrin (red), anti-Vasa (blue) and anti-GFP (green) on adult ovary. **(B)**  
741 Immunofluorescence staining on PGCs of larvae ovary. **(C)** Immunofluorescence staining on GSCs and early  
742 spermatogonia in adult testis. **(D)** Immunofluorescence staining on PGCs of larvae testis tissue. **(E)** Immunofluorescence  
743 staining with anti- $\alpha$ -Spectrin (red) and anti-Vasa (green) on testis from wild type or *eggpl<sup>l1</sup>* flies. **(F)** The measurement of  
744 distance between hub cells and early germ cyst. n=4, error bars show SEM, \*\* $P$ <0.01.

745

### 746 **Fig. 7. The function of *eggpl* might be involved in regulating cell cycle of germline cysts.**

747 **(A)** Immunofluorescence staining with anti-BrdU (red). **(B)** The oviposition of wild type, *Nos-Gal4>UAS-eggpl-RNAi* and  
748 *eggpl<sup>l1</sup>* line over 21 days. **(C)** The number of BrdU<sup>+</sup> germ cell cysts. Error bars show SEM, ns indicates no significant  
749 difference, \*\* $P$ <0.01, \*\*\* $P$ <0.001. **(D)** Immunofluorescence staining with anti-GFP on germaria from *eggpl::GFP knock-*  
750 *in* flies with or without feeding fresh yeast paste on day 2-, 7-, 14- and 21. The dotted line indicates the examined area. **(E)**  
751 Quantification of the GFP intensity mean in the *eggpl::GFP knock-in* line, n=10, \*\*\* $P$ <0.001. **(F-G)** Images of ovaries (F)  
752 or ovarioles (G) from flies of the indicated genotypes, feeding conditions, and days post-eclosion showing comparisons of  
753 the overall ovary sizes (F) and the numbers of retained matured eggs (G).

754

### 755 **Fig. 8. The *eggpl* maintains GSCs differentiation via MMP-dependent Timp regulation.**

756 **(A)** Quantification of the GFP signal in germaria from *eggpl::GFP knock-in* flies of the indicated genotypes. n=10, \* $P$ <0.05,  
757 \*\* $P$ <0.01, \*\*\* $P$ <0.001. **(B-C)** Images of ovaries (B) and quantification of ovary size (C) from flies of the indicated  
758 genotypes. Error bars show SEM, ns indicates no significant difference, \*\*\* $P$ <0.001. **(D)** Model depicting the regulation  
759 of *eggpl* expression and its role in GSCs and differentiating cysts.

760

### 761 **Supplementary Fig. 1. The preliminary analysis on scRNA-seq data**

762 **(A)** The original tSNE plot showing the distribution of distinct clusters in our dataset. **(B)** UMAP plots showing a  
763 comparison of four published datasets with the dataset produced in this study. Dataset-1, dataset-2 and dataset-3 are from  
764 Rust, *et al.* 2020, Dataset-4 is from Jevitt, *et al.* 2020. **(C)** The trajectory of undifferentiated germ cell, non-bam expressing

765 cell, young nurse cell, oocyte and older nurse cell clusters in pseudotime, which contained *tj*-expressing cells and non-  
766 *vasa*-expressing cells. **(D)** The heat map showing the expression of known typical marker genes in each cluster.

767

768 **Supplementary Fig. 2. The RNAi screen on top expressed genes and enrichment analysis on GSCs**

769 **(A)** The average number of GSCs and CBs in RNAi lines of screened top genes. Error bars show SEM, ns indicates no  
770 significant difference, \* $P < 0.05$ , \*\* $P < 0.01$ , \*\*\* $P < 0.001$ . **(B)** The typical phenotypes of germaria in selected RNAi lines  
771 stained with anti- $\alpha$ -Spectrin (green) and anti-pMad (red). **(C)** Dot plot showing the enrichment of GO terms associated  
772 with the differentially expressed genes in the 6 germ cell subclusters. **(D)** Dot plot showing the KEGG enrichment results.

773

774 **Supplementary Fig. 3. The schematic diagram of *eggpl* knock-in and knock-out lines construction and the ovary  
775 phenotype of *Nos-Gal4* and *Nos-Gal4*>*UAS-eggpl-RNAi* Line.**

776 **(A)** The tag with GFP and 6HA was inserted on *N* terminal in fly genome. The CDS indicates coding DNA sequence of  
777 *eggpl*. **(B)** The construct of *eggpl*<sup>[1]</sup> line was conducted by shifting the CDS frame. **(C)** The flow of immunofluorescence  
778 intensity analysis. The intensity values were analyzed with these command: 1. *Image > Type > RGB Stack*. 2. *Freehand*  
779 *selections > Cut*. 3. *Adjust > Threshold*. 4. *Analyze > Set Measurements > Area & Min & max gray value & Limit to*  
780 *threshold > Measure*. **(D-E)** The phenotypes of *Nos-Gal4* and *Nos-Gal4*>*UAS-eggpl-RNAi* ovary size and retained eggs  
781 on 2-, 7-, 14- and 21-day.

782

783

Figure 1

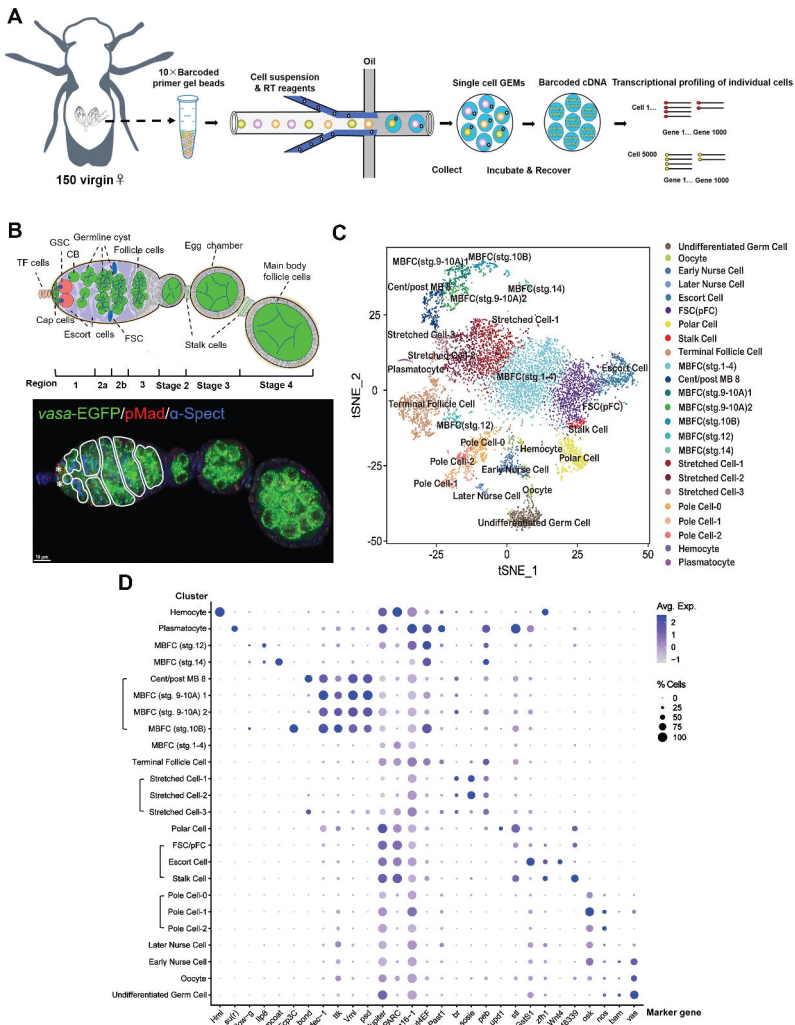



**Figure 2**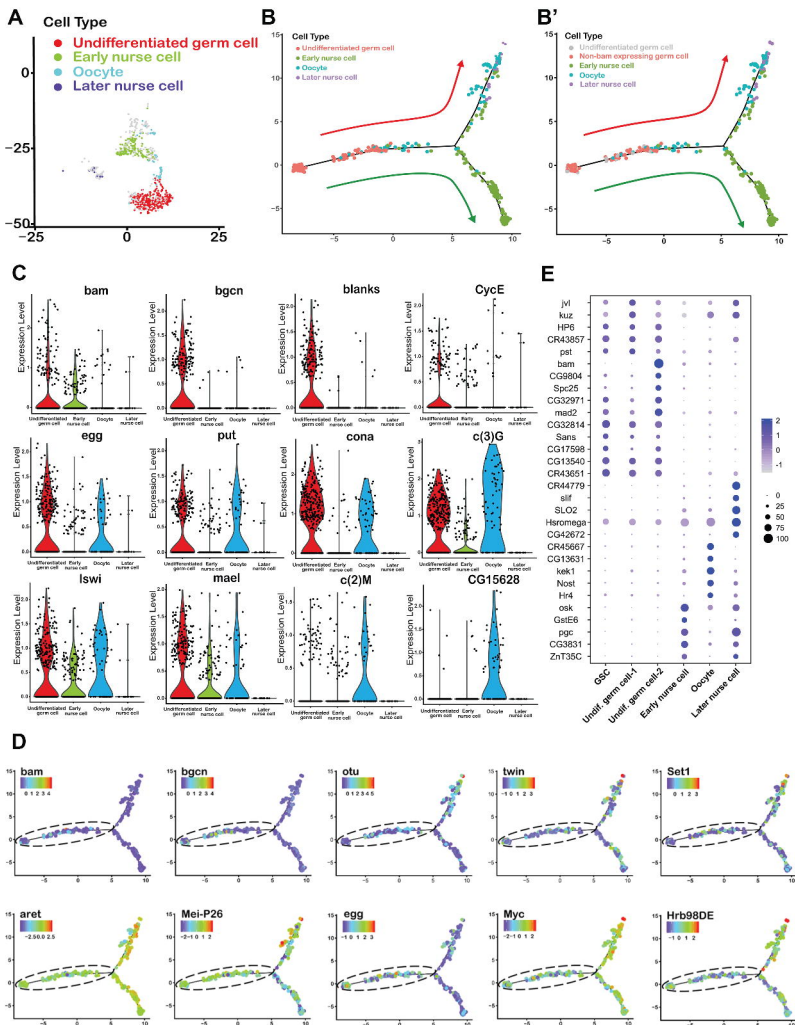

**Figure 3**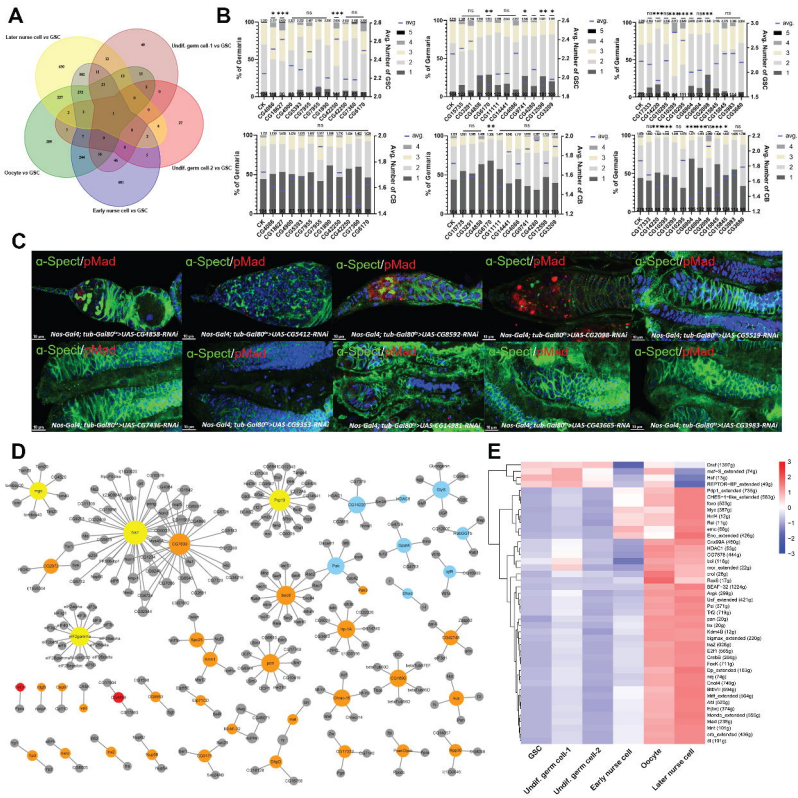

**Figure 4**

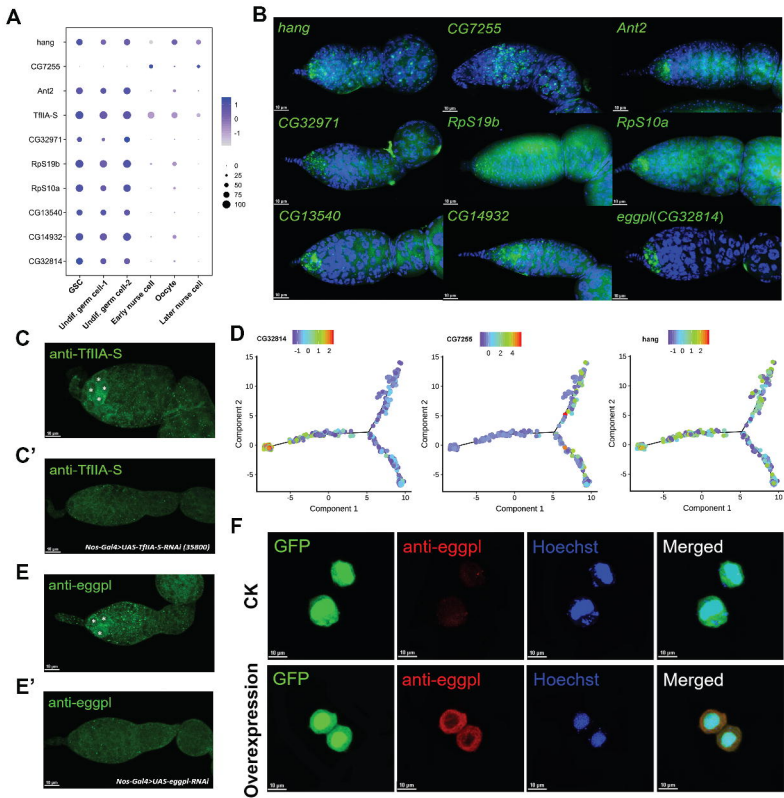

Figure 5

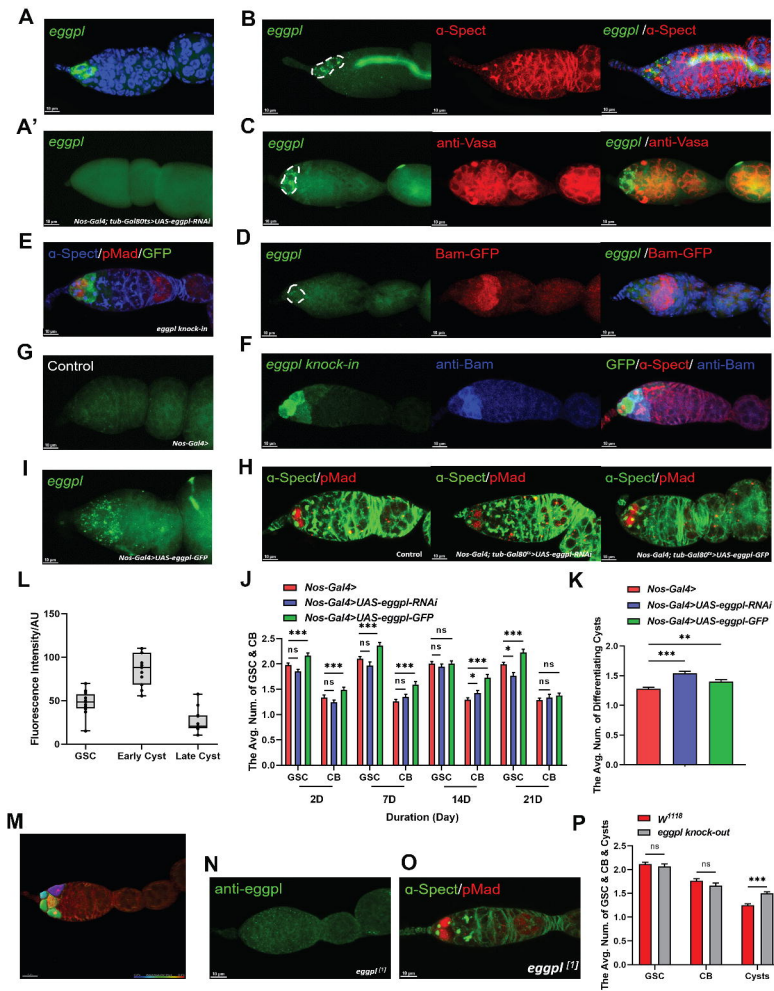

Figure 6

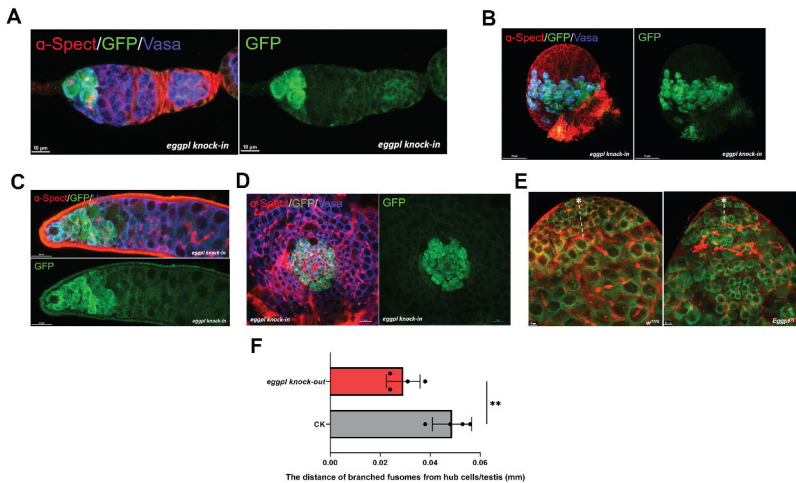

Figure 7

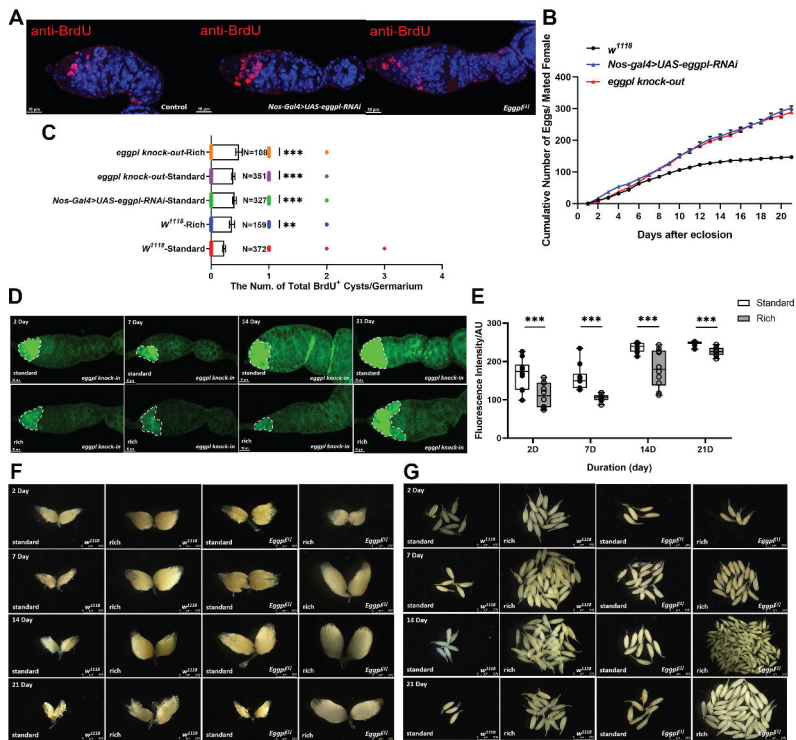

Figure 8

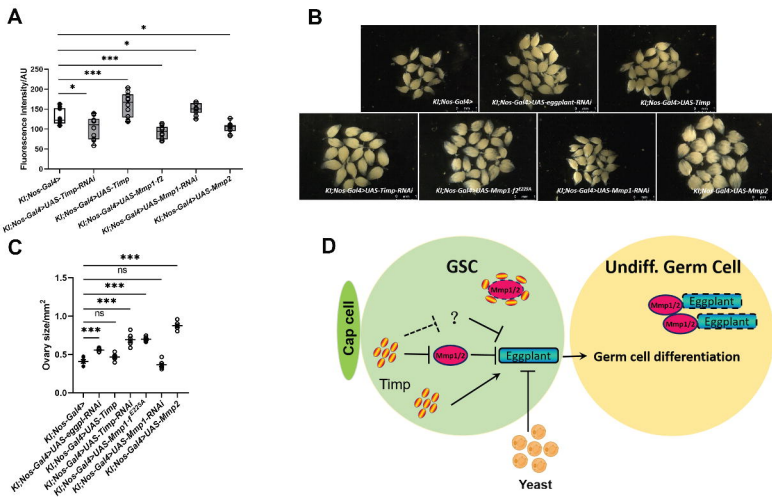

A

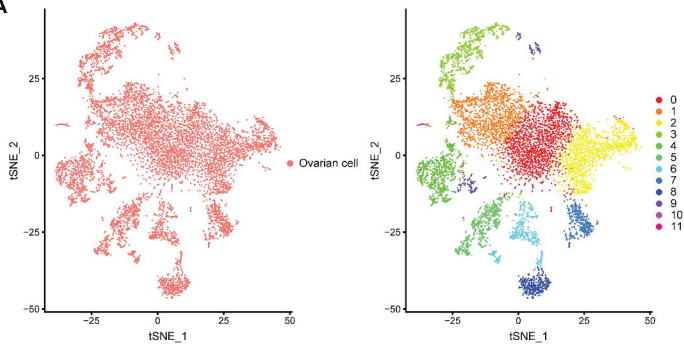

B

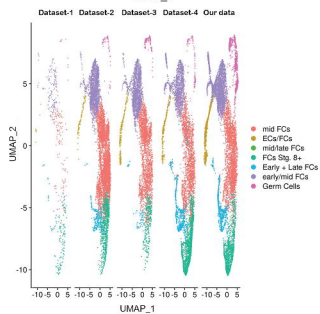

C

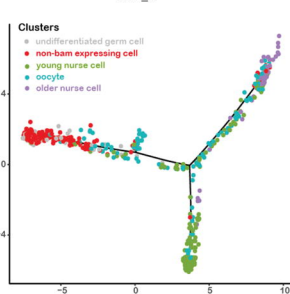

D

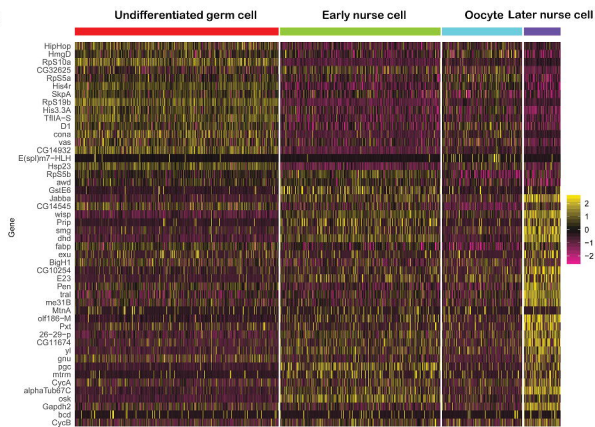

Cluster



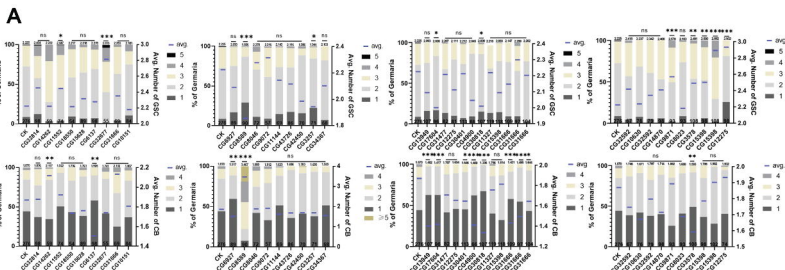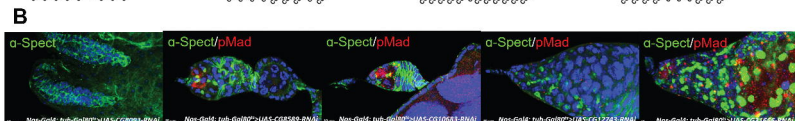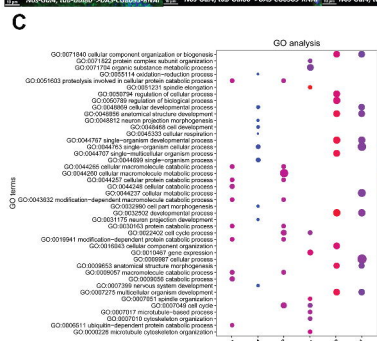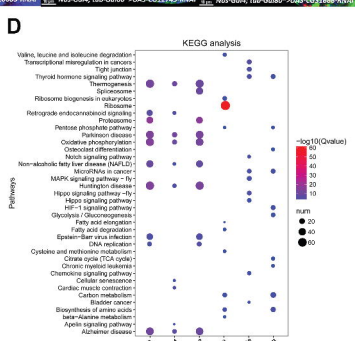

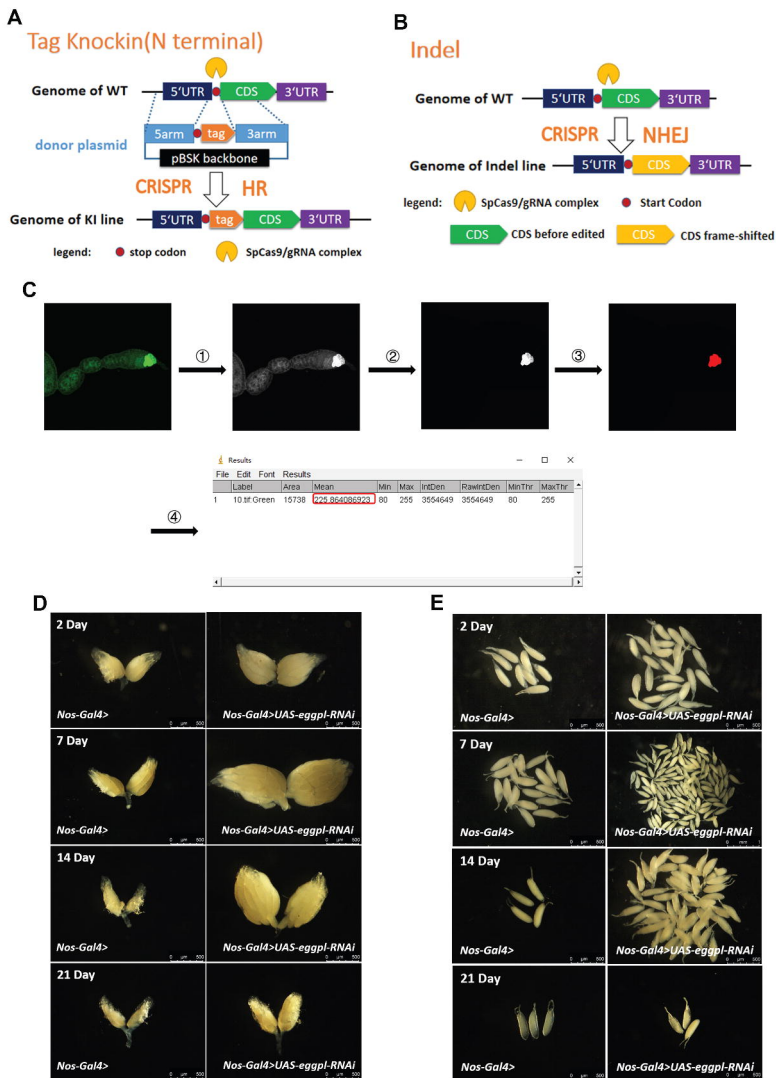

Source: https://www.biorxiv.org/content/10.1101/2022.08.15.504025v1.full.pdf
